# Supplementary material for: Highly efficient α-arylation of aryl ketones with aryl chlorides by using bulky imidazolylidene-ligated oxazoline palladacycles
Source: Royal Society of Chemistry journal article supplement (doi:10.1039/d3ob00354j), 2023-01-01
Supplement: d3ob00354j1.pdf [file d3ob00354j1.pdf]

*Electronic Supporting Information (ESI) for*

**Highly efficient  $\alpha$ -arylation of aryl ketones with aryl chlorides  
by using bulky imidazolylidene-ligated oxazoline palladacycle**

Xian Wei, Kun Wang and Weiwei Fang\*

Jiangsu Co-Innovation Center of Efficient Processing and Utilization of Forest Resources, International Innovation Center for Forest Chemicals and Materials, College of Chemical Engineering, Nanjing Forestry University, Nanjing 210037 (China)

E-mail: [wwfang2020@njfu.edu.cn](mailto:wwfang2020@njfu.edu.cn)

## Table of Contents

|                                                               |    |
|---------------------------------------------------------------|----|
| <b>1. General experimental details</b> .....                  | 3  |
| <b>2. Optimization of reaction conditions</b> .....           | 4  |
| <b>3. Substrate scopes</b> .....                              | 10 |
| <b>4. Control experiments and proposal mechanism</b> .....    | 10 |
| <b>5. General procedure for synthesis of substrates</b> ..... | 12 |
| <b>6. Date for arylation products</b> .....                   | 14 |

## 1. General experimental details

All reagents were commercially available unless otherwise noted. Precatalysts **Cat.1-Cat.12** were synthesized according to previously reported literatures.<sup>1</sup> All reactions were carried out under argon atmosphere in dried glassware. Air and moisture sensitive liquids and solutions were transferred *via* syringe. All solvents were dried and distilled by standard procedures. Solutions were concentrated under reduced pressure by rotary evaporation. Chromatographic purification of products was accomplished on silica gel Si 60® (300-400 mesh).

Nuclear magnetic resonance spectra were acquired on a Bruker AMX 400 (400 MHz, and 100 MHz for <sup>1</sup>H, and <sup>13</sup>C respectively) and a Bruker DRX 600 (500 MHz, and 150 MHz for <sup>1</sup>H, and <sup>13</sup>C respectively). All <sup>1</sup>H NMR spectra are reported in parts per million (ppm) downfield of TMS and were measured relative to the signals at 7.26 ppm (CDCl<sub>3</sub>). All <sup>13</sup>C NMR spectra were reported in ppm relative to CDCl<sub>3</sub> (77.16 ppm) were obtained with <sup>1</sup>H-decoupling. Data for <sup>1</sup>H-NMR are reported as follows: chemical shift ( $\delta$  in ppm), multiplicity (s = singlet; brs = broad singlet; vbs = vary broad singlet; d = doublet; t = triplet; q = quartet; quint = quintet; sext = sextet; m = multiplet), coupling constant (Hz), integration. Data for <sup>13</sup>C-NMR are reported in terms of chemical shift ( $\delta$  in ppm), multiplicity, coupling constant (Hz). High-resolution mass spectra were obtained on a Finnigan MAT 8200 instrument.

## 2. Optimization of reaction conditions

### 2.1 $\alpha$ -Arylation of *p*-methylpropiophenone **2a** with chlorobenzene **1a**

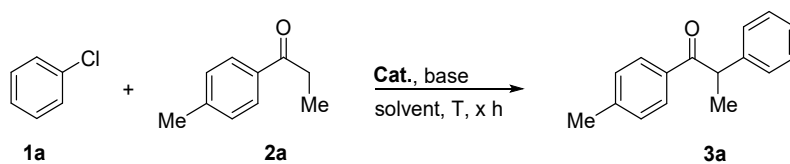

**Scheme S1**  $\alpha$ -Arylation of chlorobenzene **1a** and *p*-methylpropiophenone **2a**

**Table S1<sup>a</sup>** Screening the amount of H<sub>2</sub>O

| Entry | H <sub>2</sub> O/ $\mu$ L | Yield/% |
|-------|---------------------------|---------|
| 1     | 0                         | 26      |
| 2     | 5                         | 30      |
| 3     | 8                         | 58      |
| 4     | 10                        | 73      |
| 5     | 12                        | 76      |
| 6     | 13                        | 87      |
| 7     | 14                        | 72      |
| 8     | 15                        | 71      |
| 9     | 20                        | 70      |
| 10    | 40                        | 26      |
| 11    | 60                        | trace   |

<sup>a</sup> Standard condition: **1a** (1.0 mmol), **2a** (1.2 mmol), dioxane (3 mL), **Cat.1** (0.5 mol%), *t*BuONa (2.0 mmol), H<sub>2</sub>O (x  $\mu$ L), 12 h, 100 °C. Isolated yield.

**Table S2<sup>a</sup>** Screening solvents

| Entry | Solvent | Yield/% |
|-------|---------|---------|
| 1     | dioxane | 87      |
| 2     | DME     | 83      |
| 3     | THF     | 72      |
| 4     | MTBE    | 77      |



|    |         |       |
|----|---------|-------|
| 5  | toluene | trace |
| 6  | ACN     | 51    |
| 7  | EtOH    | NR    |
| 8  | CPME    | 62    |
| 9  | DMF     | 32    |
| 10 | DMSO    | 8     |

<sup>a</sup> Standard condition: **1a** (1.0 mmol), **2a** (1.2 mmol), solvent (3 mL), **Cat.1** (0.5 mol%), *t*BuONa (2.0 mmol), H<sub>2</sub>O (13 μL), 12 h, 100 °C. Isolated yield. THF= tetrahydrofuran; MTBE =methyl *tert*-butyl ether; ACN = acetonitrile; DMF = dimethyl formamide; DMSO = dimethyl sulfoxide.

**Table S3<sup>a</sup>** Screening bases

| Entry | Base                            | Yield/% |
|-------|---------------------------------|---------|
| 1     | <i>t</i> BuONa                  | 87      |
| 2     | <i>t</i> BuOK                   | 28      |
| 3     | <i>t</i> BuOLi                  | 9       |
| 4     | Cs <sub>2</sub> CO <sub>3</sub> | NR      |
| 5     | Na <sub>2</sub> CO <sub>3</sub> | NR      |
| 6     | K <sub>3</sub> PO <sub>4</sub>  | NR      |
| 7     | KOH                             | 55      |
| 8     | Et <sub>3</sub> N               | NR      |

<sup>a</sup> Standard condition: **1a** (1.0 mmol), **2a** (1.2 mmol), dioxane (3 mL), **Cat.1** (0.5 mol%), base (2.0 mmol), H<sub>2</sub>O (13 μL), 12 h, 100 °C. Isolated yield.

**Table S4<sup>a</sup>** Screening equiv. of *t*BuONa

| Entry | n equiv. | Yield/% |
|-------|----------|---------|
| 1     | 1.0      | 34      |
| 2     | 1.2      | 31      |
| 3     | 1.5      | 66      |
| 4     | 1.8      | 64      |

|   |     |    |
|---|-----|----|
| 5 | 2.0 | 87 |
| 6 | 2.2 | 65 |
| 7 | 2.5 | 18 |

<sup>a</sup> Standard condition: **1a** (1.0 mmol), **2a** (1.2 mmol), dioxane (3 mL), **Cat.1** (0.5 mol%), *t*BuONa (x mmol), H<sub>2</sub>O (13 μL), 12 h, 100 °C. Isolated yield.

**Table S5<sup>a</sup>** Screening catalyst-loading

| Entry | Cat./mol% | Yield/% |
|-------|-----------|---------|
| 1     | 0.25      | 63      |
| 2     | 0.5       | 87      |

<sup>a</sup> Standard condition: **1a** (1.0 mmol), **2a** (1.2 mmol), dioxane (3 mL), **Cat.1** (x mol%), *t*BuONa (2.0 mmol), H<sub>2</sub>O (13 μL), 12 h, 100 °C. Isolated yield.

**Table S6<sup>a</sup>** Screening temperature

| Entry | T/°C | Yield/% |
|-------|------|---------|
| 1     | 60   | 78      |
| 2     | 70   | 84      |
| 3     | 80   | 81      |
| 4     | 90   | 88      |
| 5     | 100  | 87      |
| 6     | 110  | 56      |

<sup>a</sup> Standard condition: **1a** (1.0 mmol), **2a** (1.2 mmol), dioxane (3 mL), **Cat.1** (0.5 mol%), *t*BuONa (2.0 mmol), H<sub>2</sub>O (13 μL), 12 h, T °C. Isolated yield.

**Table S7<sup>a</sup>** Screening equiv. of *p*-methylphenylacetone **2a**

| Entry | n equiv. | Yield/% |
|-------|----------|---------|
| 1     | 1.0      | 83      |
| 2     | 1.2      | 88      |
| 3     | 1.3      | 88      |
| 4     | 1.4      | 91      |

|   |     |    |
|---|-----|----|
| 5 | 1.5 | 93 |
| 6 | 1.6 | 83 |

<sup>a</sup> Standard condition: **1a** (1.0 mmol), **2a** (x mmol), dioxane (3 mL), **Cat.1** (0.5 mol%), *t*BuONa (2.0 mmol), H<sub>2</sub>O (13 μL), 12 h, 90 °C. Isolated yield.

**Table S8<sup>a</sup>** Screening the volume of solvent

| Entry | Volume/mL | Yield/% |
|-------|-----------|---------|
| 1     | 2         | 87      |
| 2     | 3         | 93      |
| 3     | 4         | 86      |

<sup>a</sup> Standard condition: **1a** (1.0 mmol), **2a** (1.5 mmol), dioxane (x mL), **Cat.1** (0.5 mol%), *t*BuONa (2.0 mmol), H<sub>2</sub>O (13 μL), 12 h, 90 °C. Isolated yield.

**Table S9<sup>a</sup>** Screening reaction time

| Entry | Time/h | Yield/% |
|-------|--------|---------|
| 1     | 6      | 90      |
| 2     | 12     | 93      |
| 3     | 18     | 91      |
| 4     | 24     | 90      |

<sup>a</sup> Standard condition: **1a** (1.0 mmol), **2a** (1.5 mmol), dioxane (3 mL), **Cat.1** (0.5 mol%), *t*BuONa (2.0 mmol), H<sub>2</sub>O (13 μL), x h, 90 °C. Isolated yield.

**Table S10<sup>a</sup>** Screening catalysts

| Entry | Cat.         | Yield/% |
|-------|--------------|---------|
| 1     | <b>Cat.1</b> | 93      |
| 2     | <b>Cat.2</b> | 85      |
| 3     | <b>Cat.3</b> | 87      |
| 4     | <b>Cat.4</b> | 91      |
| 5     | <b>Cat.5</b> | 89      |
| 6     | <b>Cat.6</b> | 91      |

|   |              |    |
|---|--------------|----|
| 7 | <b>Cat.7</b> | 92 |
| 8 | <b>Cat.8</b> | 85 |
| 9 | <b>Cat.9</b> | 92 |

<sup>a</sup> Standard condition: **1a** (1.0 mmol), **2a** (1.5 mmol), dioxane (3 mL), **Cat.** (0.5 mol%), *t*BuONa (2.0 mmol), H<sub>2</sub>O (13 μL), 12 h, 90 °C. Isolated yield.

## 2.2 $\alpha$ -Arylation of *p*-methylpropiophenone **2a** with *p*-chloroanisole **1e**

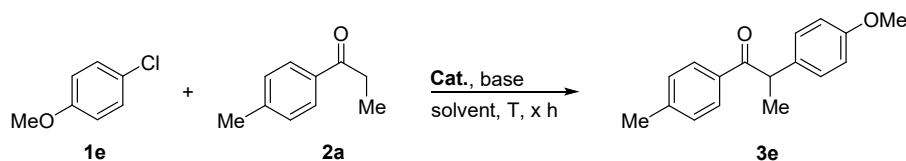

**Scheme S2**  $\alpha$ -Arylation of *p*-chloroanisole **1e** and *p*-methylpropiophenone **2a**

**Table S11<sup>a</sup>** Screening the amount of H<sub>2</sub>O

| Entry | H <sub>2</sub> O/ $\mu$ L | Yield/% |
|-------|---------------------------|---------|
| 1     | 0                         | NR      |
| 2     | 8                         | 63      |
| 3     | 10                        | 64      |
| 4     | 13                        | 61      |
| 5     | 15                        | 44      |
| 6     | 18                        | 44      |
| 7     | 20                        | NR      |

<sup>a</sup> Standard condition: **1e** (1.0 mmol), **2a** (1.5 mmol), dioxane (3 mL), **Cat.1** (0.5 mol%), *t*BuONa (2.0 mmol), H<sub>2</sub>O (x  $\mu$ L), 12 h, 90 °C. Isolated yield.

**Table S12<sup>a</sup>** Screening catalysts

| Entry | <b>Cat.</b>  | Yield/% |
|-------|--------------|---------|
| 1     | <b>Cat.1</b> | 64      |
| 2     | <b>Cat.2</b> | 81      |

|    |               |                    |
|----|---------------|--------------------|
| 3  | <b>Cat.3</b>  | 15                 |
| 4  | <b>Cat.4</b>  | 94/93 <sup>b</sup> |
| 5  | <b>Cat.5</b>  | 89                 |
| 6  | <b>Cat.6</b>  | 55                 |
| 7  | <b>Cat.7</b>  | 68                 |
| 8  | <b>Cat.8</b>  | 67                 |
| 9  | <b>Cat.9</b>  | 58                 |
| 10 | <b>Cat.10</b> | 79                 |
| 11 | <b>Cat.11</b> | 93                 |
| 12 | <b>Cat.12</b> | 82                 |

<sup>a</sup> Standard condition: **1e** (1.0 mmol), **2a** (1.5 mmol), dioxane (3 mL), **Cat.** (0.5 mol%), *t*BuONa (2.0 mmol), H<sub>2</sub>O (10 μL), 12 h, 90 °C. Isolated yield. <sup>b</sup> D<sub>2</sub>O (10 μL).

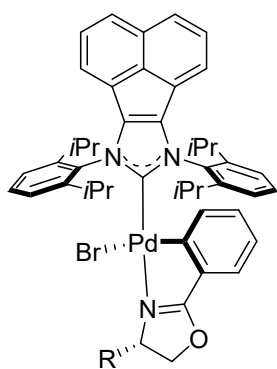

R = *i*Pr, *t*Bu, Ph

**Cat.1-3**

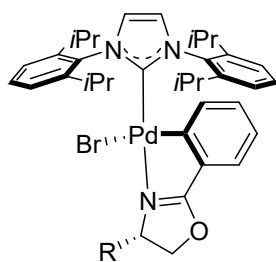

R = *i*Pr, *t*Bu, Ph

**Cat.4-6**

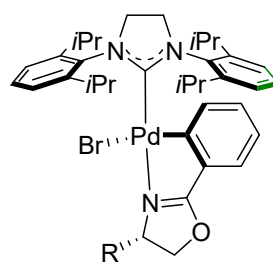

R = *i*Pr, *t*Bu, Ph

**Cat.7-9**

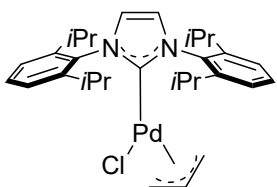

**Cat.10**

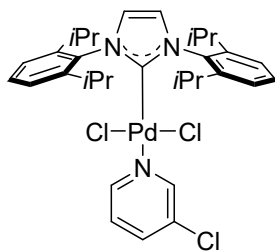

**Cat.11**

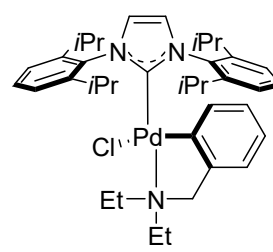

**Cat.12**

### 3. Substrate scopes

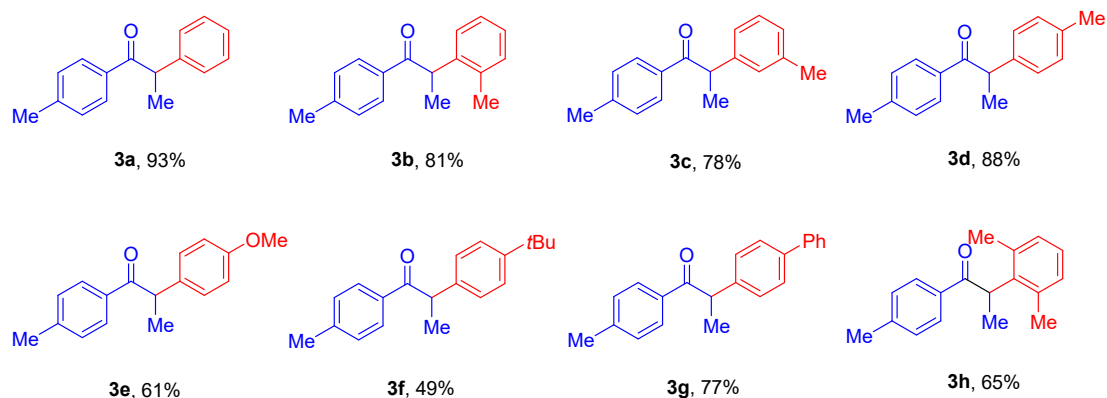

**Scheme S3** Substrate scopes catalyzed by using **Cat.1** according to standard condition A: Standard condition (Method A): **1** (1.0 mmol), **2** (1.5 mmol), **Cat.1** (0.5 mol%), *t*BuONa (2.0 mmol), H<sub>2</sub>O (13  $\mu$ L), dioxane (3 mL), 12 h, 90 °C. Isolated yield.

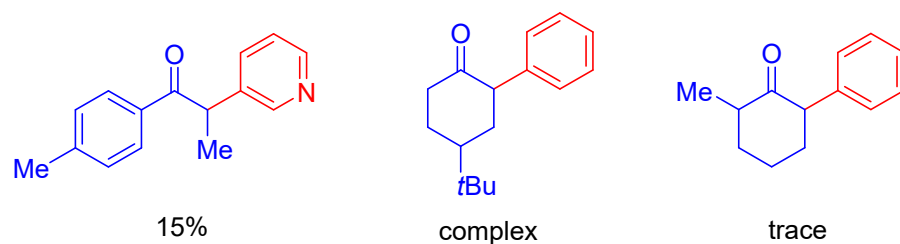

**Scheme S4** Substrates tested with poor reactivity by using **Cat.4** according to standard condition (Method B): **1** (1.0 mmol), **2** (1.5 mmol), **Cat.4** (0.5 mol%), *t*BuONa (2.0 mmol), H<sub>2</sub>O (10  $\mu$ L), dioxane (3 mL), 12 h, 90 °C. Isolated yield.

### 4. Control experiments and proposal mechanism

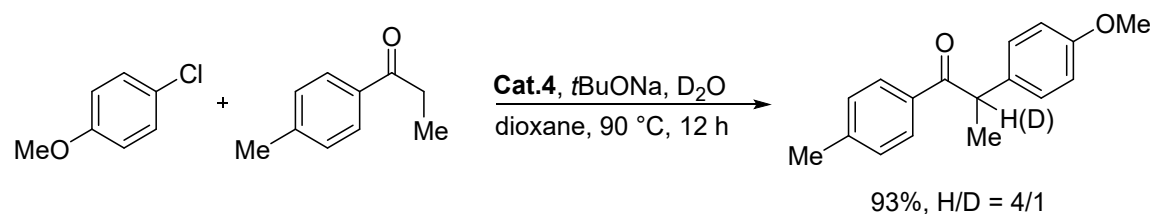

**Scheme S5**  $\alpha$ -Arylation of *p*-chloroanisole **1e** and *p*-methylpropiophenone **2a** in the presence of D<sub>2</sub>O

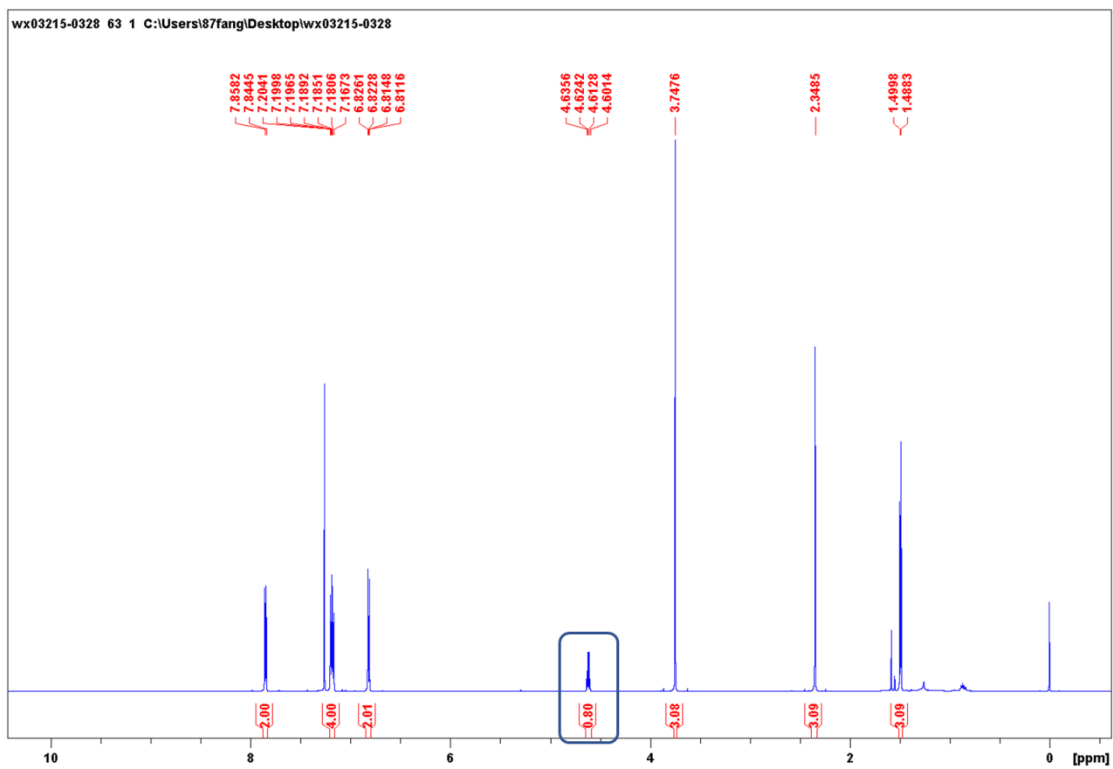

Fig. S1  $^1\text{H}$  NMR (600 MHz,  $\text{CDCl}_3$ ) spectrum of  $3e'$  in the presence of  $\text{D}_2\text{O}$

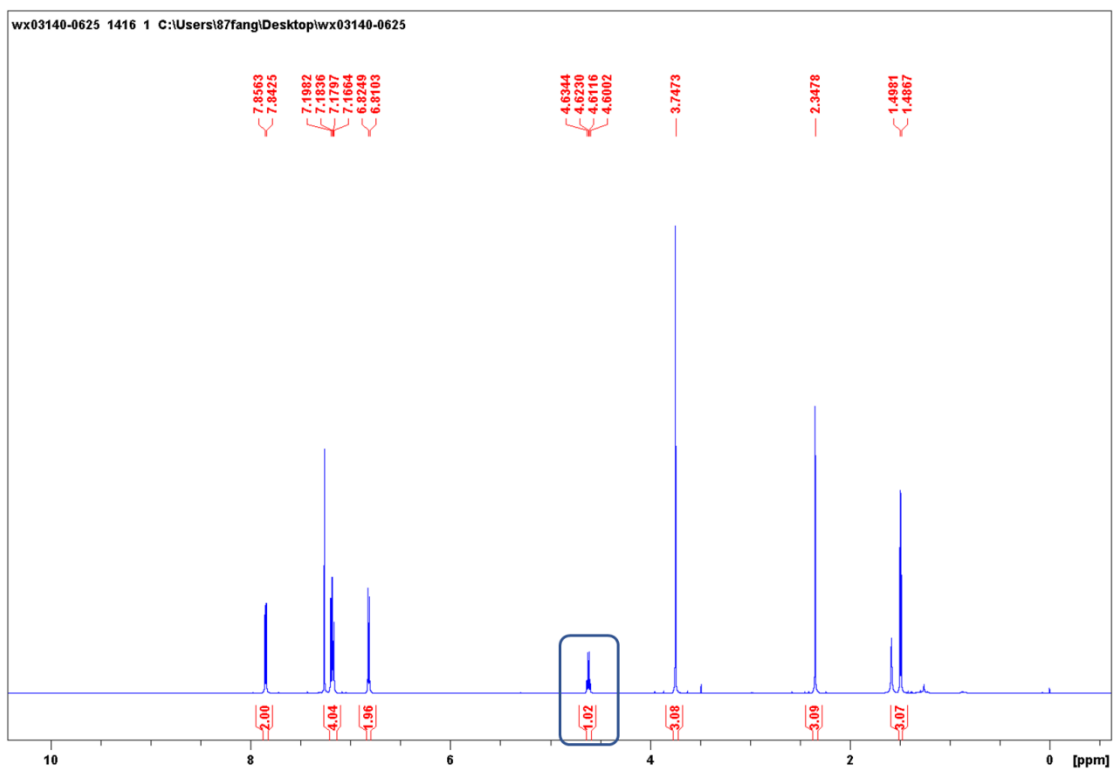

Fig. S2  $^1\text{H}$  NMR (600 MHz,  $\text{CDCl}_3$ ) spectrum of  $3e$  in the presence of  $\text{H}_2\text{O}$

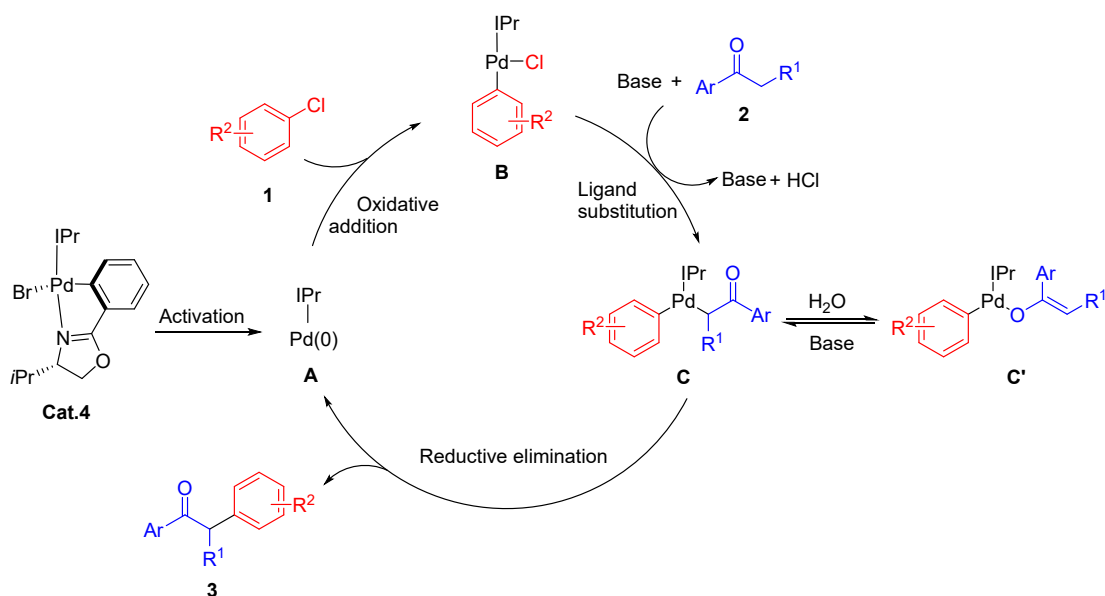

**Scheme S6** Proposed reaction mechanism of  $\alpha$ -arylation catalyzed by **Cat.4**

At the current stage, we suggested the presence of  $\text{H}_2\text{O}$  effected the keto-enol tautomerism equilibrium, however, its role in the activation of the precatalyst<sup>2</sup> could be excluded. We will carry out the DFT calculations with other groups to get a deep insight.

## 5. General procedure for synthesis of substrates

To a flame dried round bottom flask equipped with a magnetic stir bar, diisopropylamine (0.92 mL, 6.6 mmol) in dry THF (15 mL) was added at  $-78\text{ }^\circ\text{C}$ . Then, *n*BuLi (2.64 mL, 6.6 mmol, 2.5 M in Hexane) was added dropwise, and the reaction mixture was stirred for 30 minutes. Then, acetophenone (0.70 mL, 6 mmol) was added and reacted for 30 minutes. Then, methyl iodide (0.45 mL, 7.2 mmol) in dry THF (15 mL) was added. After 4 h, the reaction was quenched with saturated ammonium chloride. The organic phase was separated, and the aqueous phase was washed with hexane (1 $\times$ 5 mL). The combined organic phases were washed with 1 M HCl (1 $\times$ 10 mL), dried over anhydrous sodium sulfate, filtered, and evaporated under reduced pressure. The crude products were further purified by column chromatography leading to desired products.



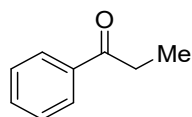

**2q:** Following the **General procedure**, **2q** was obtained as a yellow oil, 645.7 mg, yield = 27%.

$^1\text{H NMR}$  (600 MHz,  $\text{CDCl}_3$ ):  $\delta$  = 7.98-7.95 (m, 2H), 7.57-7.54 (m, 1H), 7.48-7.44 (m, 2H), 3.01 (q,  $J$  = 7.2 Hz, 2H), 1.23 (t,  $J$  = 7.2 Hz, 3H). The data was the same to previous literature.<sup>3</sup>

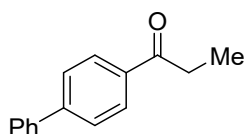

**2u:** Following the **General procedure**, **2u** was obtained as a white solid, 359.3 mg, yield = 28%.

$^1\text{H NMR}$  (600 MHz,  $\text{CDCl}_3$ ):  $\delta$  = 8.06-8.03 (m, 2H), 7.70-7.67 (m, 2H), 7.64-7.62 (m, 2H), 7.49-7.46 (m, 2H), 7.46-7.38 (m, 1H), 3.04 (q,  $J$  = 7.2 Hz, 2H), 1.26 (t,  $J$  = 7.2 Hz, 3H). The data was the same to previous literature.<sup>4</sup>

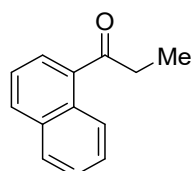

**2y:** Following the **General procedure**, **2y** was obtained as a yellow oil, 325.8 mg, yield = 15%.

$^1\text{H NMR}$  (400 MHz,  $\text{CDCl}_3$ ):  $\delta$  = 8.56 ( $J$  = 8.5 Hz, 1H), 7.97 (d,  $J$  = 8.0 Hz, 1H), 7.98 (d,  $J$  = 8.0 Hz, 1H), 7.90-7.83 (dd,  $J$  = 7.5, 1.0 Hz, 2H), 7.62-7.47 (m, 3H), 3.08 (q,  $J$  = 7.0 Hz, 2H), 1.29 (t,  $J$  = 7.0 Hz, 3H). The data was the same to previous literature.<sup>5</sup>

## 6. Data for arylation products

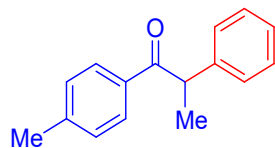

**3a:** Pale yellow oil, 203.1 mg, yield: 91%.

$^1\text{H}$  NMR (600 MHz,  $\text{CDCl}_3$ ):  $\delta$  = 7.86 (d,  $J$  = 8.2 Hz, 2H), 7.28-7.29 (d,  $J$  = 4.4 Hz, 4H), 7.22-7.16 (m, 3H), 4.67 (q,  $J$  = 6.8 Hz, 1H), 2.35 (s, 3H), 1.53 (d,  $J$  = 6.9 Hz, 3H).

Data is consistent with that reported in the literature.<sup>6</sup>

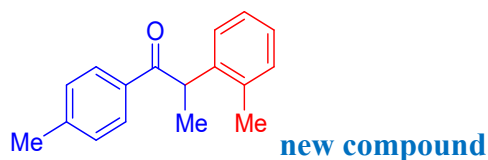

**3b:** Pale yellow solid, 206.0 mg, yield: 86%.

$^1\text{H}$  NMR (600 MHz,  $\text{CDCl}_3$ ):  $\delta$  = 7.74 (d,  $J$  = 8.2 Hz, 2H), 7.20 (d,  $J$  = 7.1 Hz, 1H), 7.15 (d,  $J$  = 8.0 Hz, 2H), 7.12-7.06 (m, 2H), 7.04-7.02 (d,  $J$  = 7.4 Hz, 1H), 4.74 (q,  $J$  = 6.8 Hz, 1H), 2.49 (s, 3H), 2.34 (s, 3H), 1.47 (d,  $J$  = 6.8 Hz, 3H).

$^{13}\text{C}$  NMR (150 MHz,  $\text{CDCl}_3$ ):  $\delta$  = 200.6, 143.4, 140.4, 134.5, 134.1, 130.9, 129.2, 128.6, 127.0, 126.8, 126.7, 44.5, 21.5, 19.6, 18.0.

HR-MS (ESI,  $m/z$ ): calcd for  $\text{C}_{17}\text{H}_{18}\text{O}$  [ $\text{M}+\text{H}$ ] $^+$ : 239.1430. found: 239.1426.

m.p.: 63.4-66.7 °C.

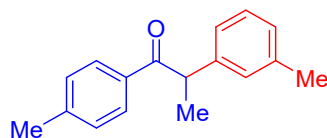

**3c:** Pale yellow oil, 215.8 mg, yield: 91%.

$^1\text{H}$  NMR (600 MHz,  $\text{CDCl}_3$ ):  $\delta$  = 7.86 (d,  $J$  = 8.2 Hz, 2H), 7.20-7.15 (m, 3H), 7.08 (d,  $J$  = 1.8 Hz, 2H), 6.98 (d,  $J$  = 7.5 Hz, 1H), 4.62 (q,  $J$  = 6.8 Hz, 1H), 2.35 (s, 3H), 2.30 (s, 3H), 1.50 (d,  $J$  = 6.8 Hz, 3H). Data is consistent with that reported in the literature.<sup>7</sup>

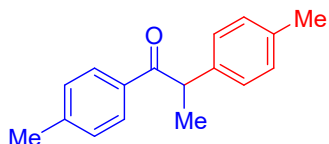

**3d:** Pale yellow oil, 219.0 mg, yield: 92%.

$^1\text{H}$  NMR (600 MHz,  $\text{CDCl}_3$ ):  $\delta$  = 7.86 (d,  $J$  = 8.2 Hz, 2H), 7.17 (d,  $J$  = 8.1 Hz, 4H), 7.08 (d,  $J$  = 7.9 Hz, 2H), 4.63 (q,  $J$  = 6.8 Hz, 1H), 2.35 (s, 3H), 2.28 (s, 3H), 1.50 (d,  $J$  = 6.8 Hz, 3H). Data is consistent with that reported in the literature.<sup>7</sup>

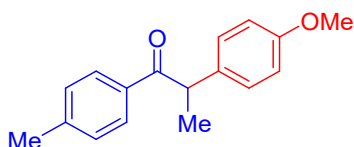

**3e:** Pale yellow oil, 239.6 mg, yield: 94%.

$^1\text{H}$  NMR (600 MHz,  $\text{CDCl}_3$ ):  $\delta$  = 7.85 (d,  $J$  = 8.2 Hz, 2H), 7.21-7.16 (m, 4H), 6.83-6.81 (dt,  $J$  = 8.2, 2.6 Hz, 2H), 4.62 (q,  $J$  = 6.8 Hz, 1H), 3.75 (s, 3H), 2.35 (s, 3H), 1.49 (d,  $J$  = 6.8 Hz, 3H). Data is consistent with that reported in the literature.<sup>8</sup>

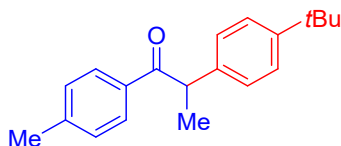

**new compound**

**3f:** Pale yellow solid, 253.8 mg, yield: 91%.

$^1\text{H}$  NMR (600 MHz,  $\text{CDCl}_3$ ):  $\delta$  = 7.88 (d,  $J$  = 8.2 Hz, 2H), 7.29 (td,  $J$  = 8.4, 2.0 Hz, 2H), 7.22-7.18 (m, 4H), 4.66 (q,  $J$  = 6.8 Hz, 1H), 2.35 (s, 3H), 1.51 (d,  $J$  = 6.6 Hz, 3H), 1.27 (s, 9H).

$^{13}\text{C}$  NMR (150 MHz,  $\text{CDCl}_3$ ):  $\delta$  = 200.2, 149.6, 143.5, 138.5, 134.1, 129.2, 129.0, 127.4, 125.8, 47.1, 34.4, 31.3, 21.6, 19.5.

HR-MS (ESI,  $m/z$ ): calcd for  $\text{C}_{20}\text{H}_{24}\text{O}$   $[\text{M}+\text{H}]^+$ : 281.1900. found: 281.1894.

m.p.: 73.8-75.9 °C.

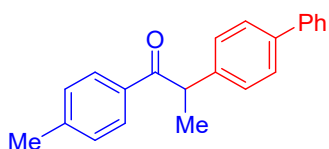

**new compound**

**3g:** White solid, 270.4 mg, yield: 90%.

$^1\text{H}$  NMR (600 MHz,  $\text{CDCl}_3$ ):  $\delta$  = 7.90 (dt,  $J$  = 8.2 Hz, 2H), 7.55-7.51 (dd,  $J$  = 7.4, 8.2 Hz, 4H), 7.41 (t,  $J$  = 7.7 Hz, 2H), 7.35 (d,  $J$  = 8.2 Hz, 2H), 7.33-7.30 (t,  $J$  = 7.4 Hz, 1H), 7.20 (d,  $J$  = 8.0 Hz, 2H), 4.72 (q,  $J$  = 6.8 Hz, 1H), 2.36 (s, 3H), 1.56 (d,  $J$  = 6.8 Hz, 3H).

$^{13}\text{C}$  NMR (150 MHz,  $\text{CDCl}_3$ ):  $\delta$  = 200.0, 143.7, 140.8, 140.7, 139.8, 134.0, 129.3, 129.0, 128.8, 128.2, 127.7, 127.3, 127.0, 47.4, 21.6, 19.5.

HR-MS (ESI,  $m/z$ ): calcd for  $\text{C}_{22}\text{H}_{20}\text{O}$   $[\text{M}+\text{H}]^+$ : 301.1587. found: 301.1583.

m.p.: 140.8-143.2  $^\circ\text{C}$ .

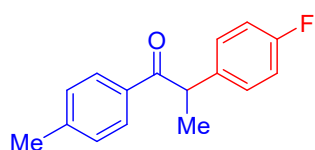

**3h:** Pale yellow oil, 234.0 mg, yield: 96%.

$^1\text{H}$  NMR (600 MHz,  $\text{CDCl}_3$ ):  $\delta$  = 7.84 (d,  $J$  = 8.2 Hz, 2H), 7.25-7.23 (m, 2H), 7.19 (d,  $J$  = 8.0 Hz, 2H), 6.99-6.95 (tt,  $J$  = 8.7, 1.83 Hz, 2H), 4.66 (q,  $J$  = 6.9 Hz, 1H), 2.36 (s, 3H), 1.50 (d,  $J$  = 6.8 Hz, 3H). Data is consistent with that reported in the literature.<sup>8</sup>

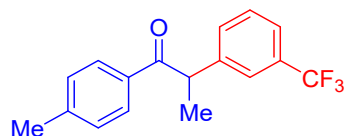

**3i:** Pale yellow oil, 160.8 mg, yield: 55%.

$^1\text{H}$  NMR (600 MHz,  $\text{CDCl}_3$ ):  $\delta$  = 7.85 (d,  $J$  = 8.2 Hz, 2H), 7.56 (s, 1H), 7.47 (t,  $J$  = 7.4 Hz, 2H), 7.40 (t,  $J$  = 7.7 Hz, 1H), 7.21 (d,  $J$  = 8.0 Hz, 2H), 4.75 (q,  $J$  = 6.9 Hz, 1H), 2.37 (s, 3H), 1.55 (d,  $J$  = 6.9 Hz, 3H). Data is consistent with that reported in the literature.<sup>8</sup>

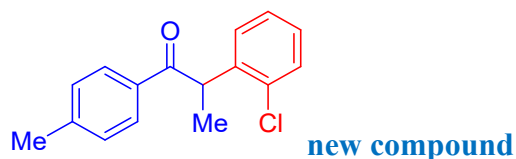

**3j:** Pale yellow oil, 113.5 mg, yield: 44%.

$^1\text{H}$  NMR (600 MHz,  $\text{CDCl}_3$ ):  $\delta$  = 7.83 (d,  $J$  = 8.2 Hz, 2H), 7.41-7.39 (m, 1H), 7.18 (d,

$J = 8.0$  Hz, 2H), 7.15-7.13 (m, 3H), 5.12 (q,  $J = 6.8$  Hz, 1H), 2.35 (s, 3H), 1.48 (d,  $J = 6.8$  Hz, 3H).

$^{13}\text{C}$  NMR (150 MHz,  $\text{CDCl}_3$ ):  $\delta = 199.7, 143.8, 139.5, 133.6, 132.9, 129.8, 129.3, 128.7, 128.6, 128.2, 127.5, 44.1, 21.6, 17.8$ .

HR-MS (ESI,  $m/z$ ): calcd for  $\text{C}_{16}\text{H}_{15}\text{ONaCl}$   $[\text{M}+\text{Na}]^+$ : 287.0704. found: 287.0711.

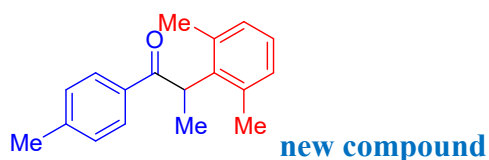

**3k**: Pale yellow solid, 194.6 mg, yield: 77%.

$^1\text{H}$  NMR (600 MHz,  $\text{CDCl}_3$ ):  $\delta = 7.60$  (d,  $J = 8.2$  Hz, 2H), 7.07 (d,  $J = 8.0$  Hz, 2H), 7.02-6.95 (m, 3H), 4.50 (q,  $J = 6.8$  Hz, 1H), 2.30 (s, 9H), 1.50 (d,  $J = 6.8$  Hz, 3H).

$^{13}\text{C}$  NMR (150 MHz,  $\text{CDCl}_3$ ):  $\delta = 201.9, 143.2, 140.1, 135.6, 134.3, 129.5, 129.0, 128.3, 126.6, 46.1, 21.5, 20.6, 14.9$ .

HR-MS (ESI,  $m/z$ ): calcd for  $\text{C}_{18}\text{H}_{20}\text{O}$   $[\text{M}+\text{H}]^+$ : 253.1587. found: 253.1584.

m.p.: 74.8-78.9 °C.

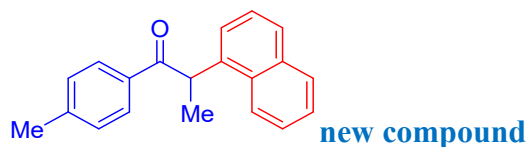

**3l**: Pale yellow solid, 247.3 mg, yield: 90%.

$^1\text{H}$  NMR (600 MHz,  $\text{CDCl}_3$ ):  $\delta = 8.25$  (d,  $J = 8.5$  Hz, 1H), 7.90 (d,  $J = 8.2$  Hz, 1H), 7.77 (d,  $J = 8.2$  Hz, 2H), 7.72 (d,  $J = 8.2$  Hz, 1H), 7.64-7.61 (m, 1H), 7.55-7.52 (m, 1H), 7.33 (t,  $J = 7.9$  Hz, 1H), 7.21 (dd,  $J = 6.6$  Hz, 0.6 Hz, 1H), 7.07 (t,  $J = 8.1$  Hz, 2H), 5.36 (q,  $J = 6.8$  Hz, 1H), 2.29 (s, 3H), 1.63 (d,  $J = 6.8$  Hz, 3H).

$^{13}\text{C}$  NMR (150 MHz,  $\text{CDCl}_3$ ):  $\delta = 200.4, 143.5, 138.3, 134.4, 133.9, 130.7, 129.3, 129.2, 128.7, 127.5, 126.7, 125.9, 125.8, 125.0, 122.6, 43.6, 21.5, 18.6$ .

HR-MS (ESI,  $m/z$ ): calcd for  $\text{C}_{20}\text{H}_{18}\text{O}$   $[\text{M}+\text{H}]^+$ : 275.1430. found: 275.1427.

m.p.: 116.8-120.8 °C.

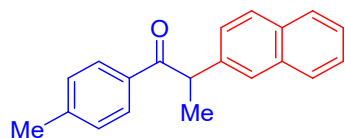

**3m**: Pale yellow oil, 257.7 mg, yield: 94%.

$^1\text{H}$  NMR (600 MHz,  $\text{CDCl}_3$ ):  $\delta$  = 7.90 (d,  $J$  = 8.3 Hz, 2H), 7.78 (t,  $J$  = 8.2 Hz, 3H), 7.72 (t,  $J$  = 1.2 Hz, 1H), 7.46-7.40 (m, 3H), 7.16 (d,  $J$  = 8.0 Hz, 2H), 4.83 (q,  $J$  = 6.8 Hz, 1H), 2.33 (s, 3H), 1.61 (d,  $J$  = 6.8 Hz, 3H). Data is consistent with that reported in the literature.<sup>8</sup>

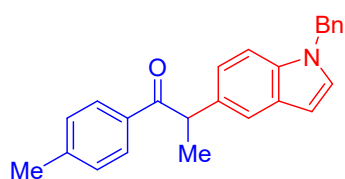

**new compound**

**3n**: Pale yellow solid, 287.6 mg, yield: 81%.

$^1\text{H}$  NMR (600 MHz,  $\text{CDCl}_3$ ):  $\delta$  = 7.82 (d,  $J$  = 8.3 Hz, 2H), 7.56 (d,  $J$  = 8.1 Hz, 1H), 7.28-7.26 (m, 3H), 7.16 (s, 1H), 7.10 (d,  $J$  = 8.1 Hz, 2H), 7.08-7.05 (m, 4H), 6.47 (d,  $J$  = 3.0 Hz, 1H), 5.26 (d,  $J$  = 3.4 Hz, 2H), 4.71 (q,  $J$  = 6.8 Hz, 1H), 2.32 (s, 3H), 1.54 (d,  $J$  = 6.8 Hz, 3H).

$^{13}\text{C}$  NMR (150 MHz,  $\text{CDCl}_3$ ):  $\delta$  = 200.0, 143.6, 140.2, 138.3, 138.0, 127.0, 124.4, 123.8, 123.0, 122.6, 47.6, 29.8, 21.6, 19.9.

HR-MS (ESI,  $m/z$ ): calcd for  $\text{C}_{25}\text{H}_{23}\text{NO}$   $[\text{M}+\text{H}]^+$ : 354.1852. found: 354.1845.

m.p.: 97.2-99.3 °C.

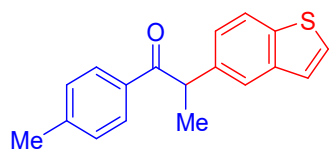

**new compound**

**3o**: Pale yellow solid, 266.9 mg, yield: 95%.

$^1\text{H}$  NMR (600 MHz,  $\text{CDCl}_3$ ):  $\delta$  = 7.88 (d,  $J$  = 8.3 Hz, 2H), 7.80 (d,  $J$  = 8.3 Hz, 1H), 7.72 (d,  $J$  = 1.5 Hz, 1H), 7.41-7.40 (d,  $J$  = 5.4 Hz, 1H), 7.30-7.28 (dd,  $J$  = 1.6, 6.7 Hz, 1H), 7.27 (s, 1H), 7.16 (d,  $J$  = 8.1 Hz, 2H), 4.79 (d,  $J$  = 6.8 Hz, 1H), 2.33 (s, 3H), 1.58 (d,  $J$  = 6.8 Hz, 3H).

$^{13}\text{C}$  NMR (150 MHz,  $\text{CDCl}_3$ ):  $\delta = 200.0, 143.6, 140.7, 137.7, 136.8, 133.9, 129.2, 128.8, 127.0, 124.8, 123.0, 121.3, 121.2, 46.0, 21.6, 18.5$ .

HR-MS (ESI,  $m/z$ ): calcd for  $\text{C}_{18}\text{H}_{16}\text{SO}$   $[\text{M}+\text{H}]^+$ : 281.0995. found: 281.0985.

m.p.: 71.4-74.8  $^\circ\text{C}$ .

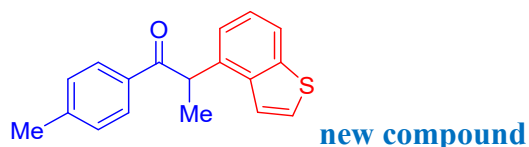

**3p**: Pale yellow solid, 257.8.9 mg, yield: 92%.

$^1\text{H}$  NMR (600 MHz,  $\text{CDCl}_3$ ):  $\delta = 7.80$  (d,  $J = 8.3$  Hz, 2H), 7.74 (d,  $J = 8.0$  Hz, 1H), 7.60 (d,  $J = 5.5$  Hz, 1H), 7.53 (d,  $J = 5.5$  Hz, 1H), 7.25-7.22 (t,  $J = 7.7$  Hz, 1H), 7.15 (d,  $J = 7.3$  Hz, 1H), 7.11 (d,  $J = 8.0$  Hz, 2H), 5.10 (d,  $J = 6.8$  Hz, 1H), 2.30 (s, 3H), 1.62 (d,  $J = 6.8$  Hz, 3H).

$^{13}\text{C}$  NMR (150 MHz,  $\text{CDCl}_3$ ):  $\delta = 200.4, 143.5, 138.3, 134.4, 133.8, 130.6, 129.3, 129.2, 128.7, 127.5, 126.7, 125.9, 125.8, 125.0, 122.6, 43.6, 21.6, 18.6$ .

HR-MS (ESI,  $m/z$ ): calcd for  $\text{C}_{18}\text{H}_{16}\text{SO}$   $[\text{M}+\text{H}]^+$ : 281.0995. found: 281.0984.

m.p.: 84.0-86.4  $^\circ\text{C}$ .

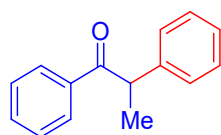

**3q**: Pale yellow oil, 196.6 mg, yield: 93%.

$^1\text{H}$  NMR (600 MHz,  $\text{CDCl}_3$ ):  $\delta = 7.95$  (d,  $J = 7.3$  Hz, 2H), 7.47 (t,  $J = 6.8$  Hz, 1H), 7.38 (t,  $J = 7.4$  Hz, 2H), 7.30-7.25 (m, 4H), 7.20 (m, 1H), 4.69 (q,  $J = 6.7$  Hz, 1H), 1.53 (d,  $J = 6.8$  Hz, 3H). Data is consistent with that reported in the literature.<sup>6</sup>

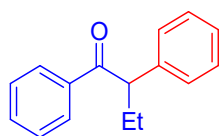

**3r**: Pale yellow oil, 215.6 mg, yield: 96%.

$^1\text{H}$  NMR (600 MHz,  $\text{CDCl}_3$ ):  $\delta = 7.97$ -7.95 (m, 2H), 7.49-7.46 (m, 1H), 7.40-7.37 (m,

2H), 7.32-7.27 (m, 4H), 7.22-7.19 (m, 1H), 4.45 (t,  $J = 7.3$  Hz, 1H), 2.24-2.17 (m, 1H), 1.90-1.83 (m, 1H), 0.91 (t,  $J = 7.4$  Hz, 3H). Data is consistent with that reported in the literature.<sup>6</sup>

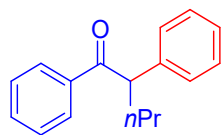

**3s:** Pale yellow oil, 217.0mg, yield: 91%.

<sup>1</sup>H NMR (600 MHz, CDCl<sub>3</sub>):  $\delta = 7.97$ -7.95 (m, 2H), 7.49-7.46 (m, 1H), 7.40-7.38 (t,  $J = 7.7$  Hz, 2H), 7.32-7.27 (m, 4H), 7.21-7.18 (m, 1H), 4.56 (t,  $J = 7.3$  Hz, 1H), 2.19-2.13 (m, 1H), 1.85-1.79 (m, 1H), 1.38-1.25 (m, 2H), 0.92 (t,  $J = 7.5$  Hz, 3H). Data is consistent with that reported in the literature.<sup>9</sup>

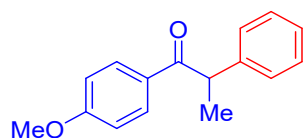

**3t:** Pale yellow oil, 237.0 mg, yield: 96%.

<sup>1</sup>H NMR (600 MHz, CDCl<sub>3</sub>):  $\delta = 7.95$  (d,  $J = 8.8$  Hz, 2H), 7.30-7.28 (m, 4H), 7.22-7.18 (m, 1H), 6.85 (d,  $J = 8.8$  Hz, 2H), 4.64 (q,  $J = 6.8$  Hz, 1H), 3.81 (s, 3H), 1.51 (d,  $J = 6.8$  Hz, 3H). Data is consistent with that reported in the literature.<sup>8</sup>

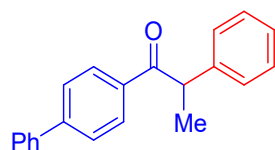

**3u:** Pale yellow oil, 218.7 mg, yield: 76%.

<sup>1</sup>H NMR (600 MHz, CDCl<sub>3</sub>):  $\delta = 8.02$  (d,  $J = 7.8$  Hz, 2H), 7.60 (dd,  $J = 11.7, 8.0$  Hz, 4H), 7.44 (d,  $J = 7.3$  Hz, 2H), 7.38 (d,  $J = 6.9$  Hz, 1H), 7.32-7.31 (m, 4H), 7.24-7.20 (m, 1H), 4.72 (q,  $J = 6.8$  Hz, 1H), 1.56 (d,  $J = 6.9$  Hz, 3H). Data is consistent with that reported in the literature.<sup>6</sup>



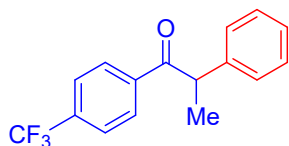

**3v:** Pale yellow oil, 225.2 mg, yield: 80%.

$^1\text{H NMR}$  (600 MHz,  $\text{CDCl}_3$ ):  $\delta$  = 8.02 (d,  $J$  = 8.1 Hz, 2H), 7.63 (d,  $J$  = 7.2, 8.2 Hz, 2H), 7.32-7.29 (m, 2H), 7.26-7.24 (m, 2H), 7.23-7.20 (m, 1H), 4.65 (q,  $J$  = 6.8 Hz, 1H), 1.55 (d,  $J$  = 6.9 Hz, 3H). Data is consistent with that reported in the literature.<sup>8</sup>

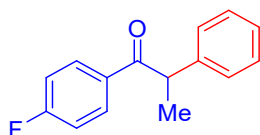

**3w:** Pale yellow oil, 190.4 mg, yield: 83%.

$^1\text{H NMR}$  (400 MHz,  $\text{CDCl}_3$ ):  $\delta$  = 7.98-7.95 (m, 2H), 7.32-7.26 (m, 4H), 7.22-7.20 (m, 1H), 7.06-7.02 (m, 2H), 4.62 (q,  $J$  = 6.8 Hz, 1H), 1.52 (d,  $J$  = 6.9 Hz, 3H). Data is consistent with that reported in the literature.<sup>10</sup>

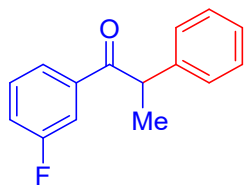

**3w:** Pale yellow oil, 164.7 mg, yield: 72%.

$^1\text{H NMR}$  (400 MHz,  $\text{CDCl}_3$ ):  $\delta$  = 7.71 (d,  $J$  = 7.8 Hz, 1H), 7.62 (dt,  $J$  = 9.6, 4.2 Hz, 1H), 7.37-7.26 (m, 5H), 7.24-7.14 (m, 2H), 4.62 (q,  $J$  = 6.8 Hz, 1H), 1.53 (d,  $J$  = 6.8 Hz, 3H). Data is consistent with that reported in the literature.<sup>7</sup>

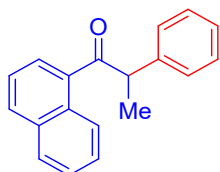

**3y:** Pale yellow oil, 85.0 mg, yield: 32%.

$^1\text{H NMR}$  (600 MHz,  $\text{CDCl}_3$ ):  $\delta$  = 7.90 (d,  $J$  = 8.2 Hz, 1H), 7.82 (d,  $J$  = 7.9 Hz, 1H), 7.75 (d,  $J$  = 7.1 Hz, 1H), 7.70 (d,  $J$  = 7.7 Hz, 1H), 7.54-7.48 (m, 2H), 7.43-7.40 (m,

1H), 7.31-7.29 (m, 2H), 7.27-7.24 (m, 2H), 7.17 (t,  $J = 7.1$  Hz, 1H), 4.70 (q,  $J = 6.8$  Hz, 1H), 1.64 (d,  $J = 6.9$  Hz, 3H). Data is consistent with that reported in the literature.<sup>11</sup>

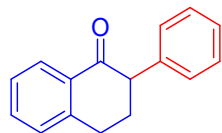

**3z:** Pale yellow oil, 39.3 mg, yield: 18%.

<sup>1</sup>H NMR (600 MHz, CDCl<sub>3</sub>):  $\delta = 8.10$  (dd,  $J = 0.9, 7.8$  Hz, 1H), 7.50 (td,  $J = 1.4, 7.5$  Hz, 1H), 7.36-7.33 (m, 3H), 7.30-7.27 (m, 2H), 7.21-7.19 (m, 2H), 3.81 (dd,  $J = 2.8, 6.5$  Hz, 1H), 3.15-3.04 (m, 2H), 2.46-2.42 (m, 2H). Data is consistent with that reported in the literature.<sup>12</sup>

## References

- 1 (a) K. Wang, H. Yang, F. Bauer, B. Breit and W. Fang, *Chem. Eur. J.*, 2023, e202300719; (b) T. Tu, W. Fang and J. Jiang, *Chem. Commun.*, 2011, **47**, 12358-12360; (c) S. Ghorai, S. U. Rehman, W. Xu, W. Huang and C. Li, *Org. Lett.*, 2020, **22**, 3519-3523; (d) Q. Deng, Y. Zhang, H. Zhu and T. Tu, *Chem. Asian J.*, 2017, **12**, 2364-2368; (e) W. Fang, Q. Deng, M. Xu and T. Tu, *Org. Lett.*, 2013, **15**, 3678-3681.
- 2 O. Navarro, N. Marion, Y. Oonishi, R. A. Kelly, 3rd and S. P. Nolan, *J. Org. Chem.*, 2006, **71**, 685-692.
- 3 T. J. Malinski and D. E. Bergbreiter, *Tetrahedron Lett.*, 2018, **59**, 3926-3929.
- 4 S. Mao, Z. Chen, L. Wang, D. B. Khadka, M. Xin, P. Li and S. Zhang, *J. Org. Chem.*, 2019, **84**, 463-471.
- 5 M. Sai, *Eur. J. Org. Chem.*, 2022, **2022**, e202200052.
- 6 J. Templ and M. Schnürch, *J. Org. Chem.*, 2022, **87**, 4305-4315.
- 7 F. Liu, Y. Hu, D. Li, Q. Zhou and J. Lu, *Tetrahedron*, 2018, **74**, 5683-5690.
- 8 M. Escudero-Casao, G. Licini and M. Orlandi, *J. Am. Chem. Soc.*, 2021, **143**, 3289-3294.
- 9 R. Kulasekharan, M. V. S. N. Maddipatla, A. Parthasarathy and V. Ramamurthy, *J. Org. Chem.*, 2013, **78**, 942-949.
- 10 J. Templ and M. Schnurch, *J. Org. Chem.*, 2022, **87**, 4305-4315.
- 11 G. M. Badger, *J. Chem. Soc.*, 1941, 535-538.
- 12 H. Y. Yin, X. L. Lin, S. W. Li and L. X. Shao, *Org. Biomol. Chem.*, 2015, **13**, 9012-9021.

## 7. NMR and HR-MS (ESI) spectra

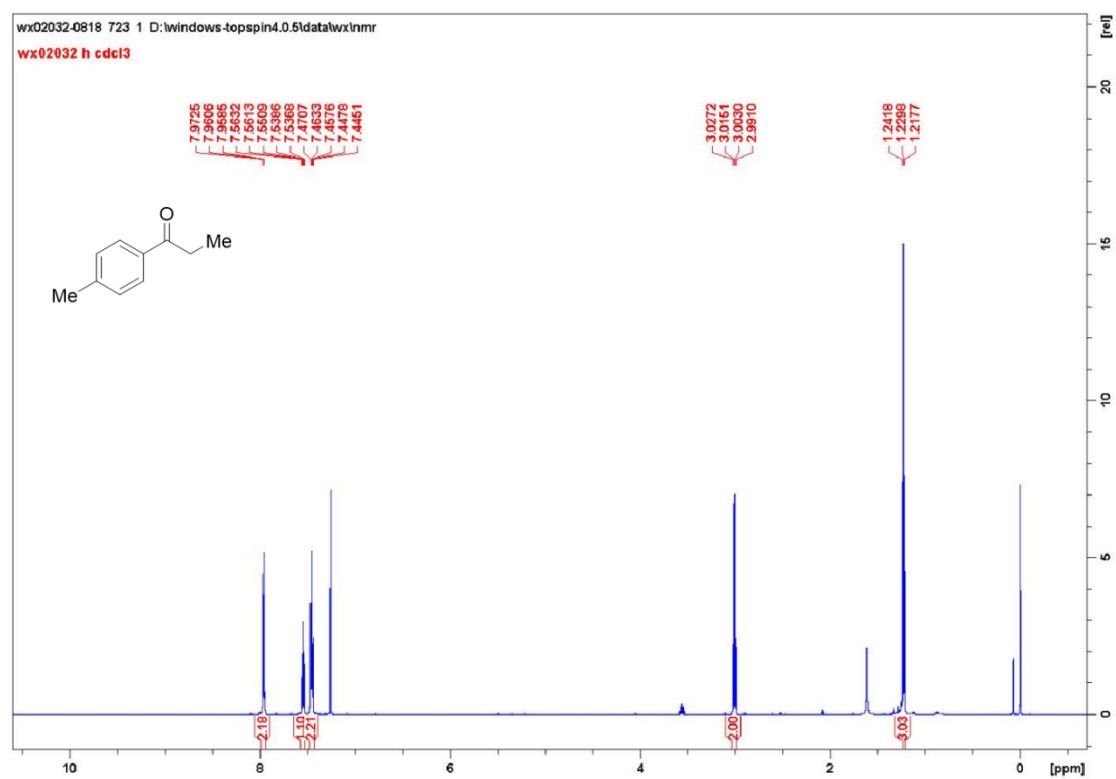

$^1\text{H}$  NMR (600 MHz,  $\text{CDCl}_3$ ) spectrum of **2q**.

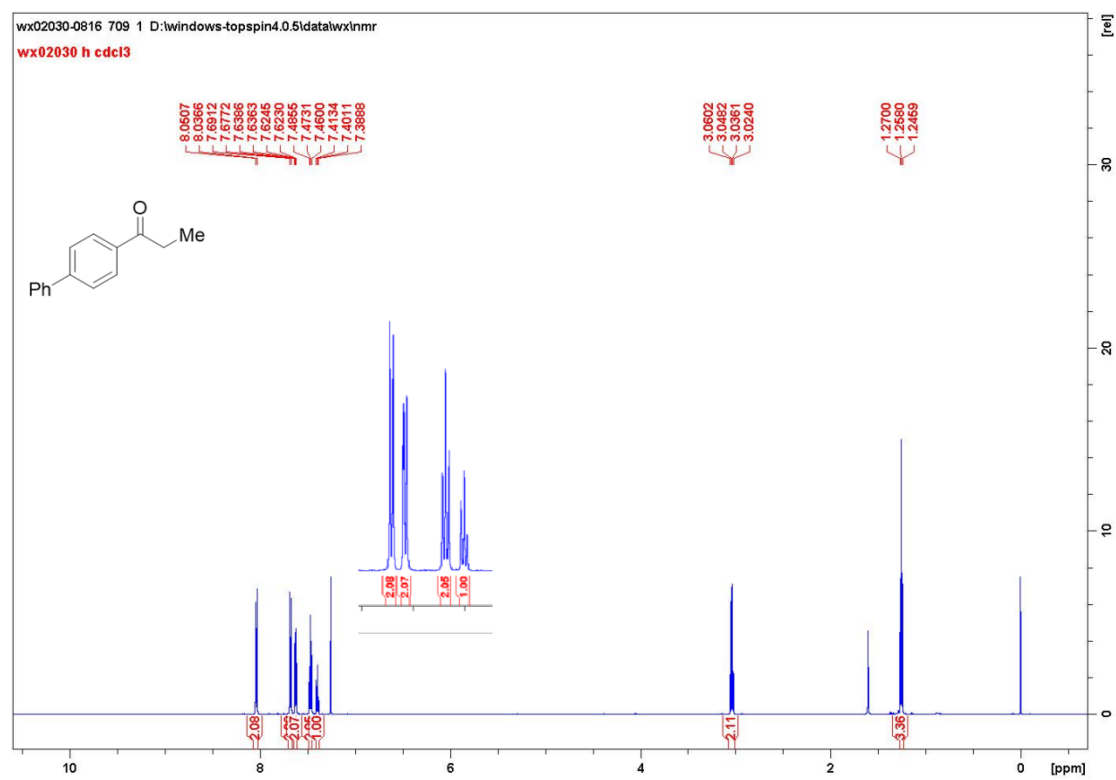

$^1\text{H}$  NMR (600 MHz,  $\text{CDCl}_3$ ) spectrum of **2u**.

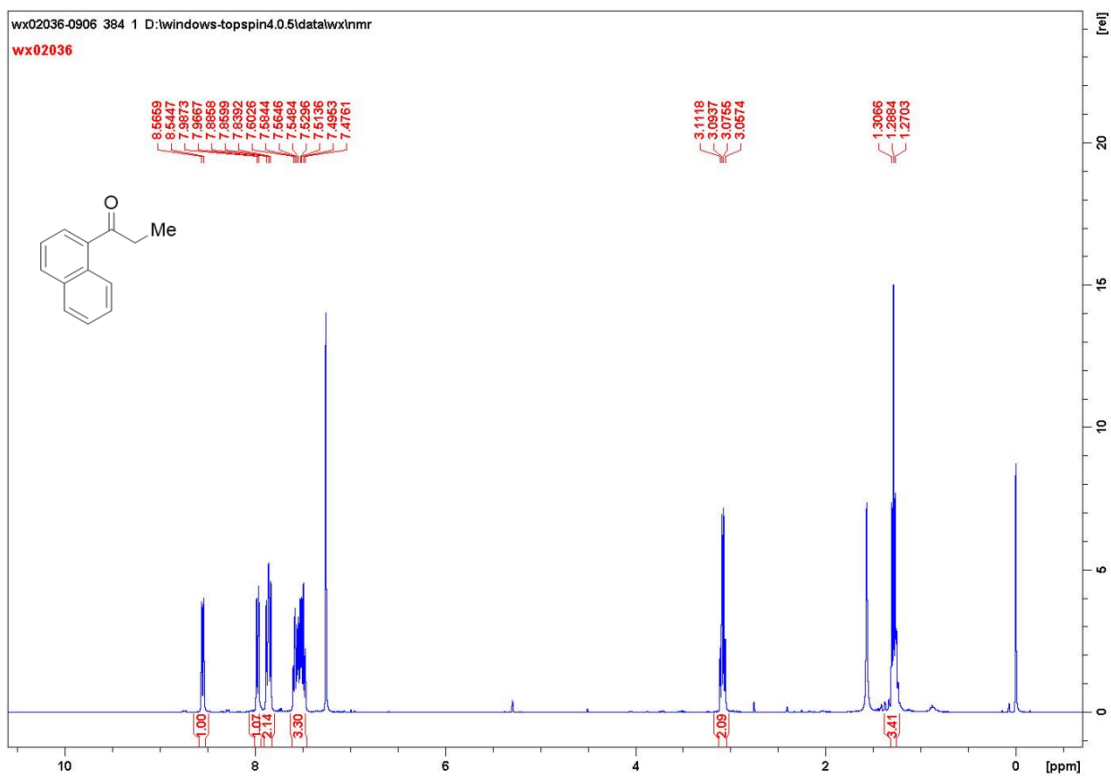

$^1\text{H}$  NMR (400 MHz,  $\text{CDCl}_3$ ) spectrum of **2y**.

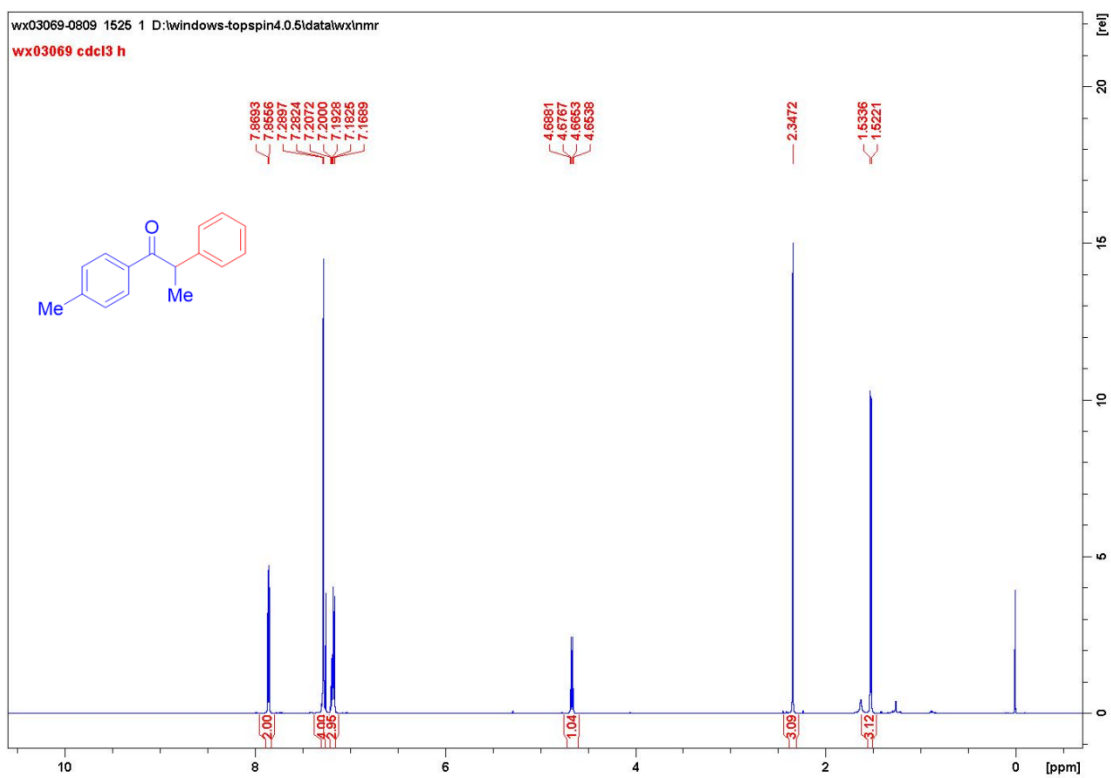

$^1\text{H}$  NMR (600 MHz,  $\text{CDCl}_3$ ) spectrum of **3a**.

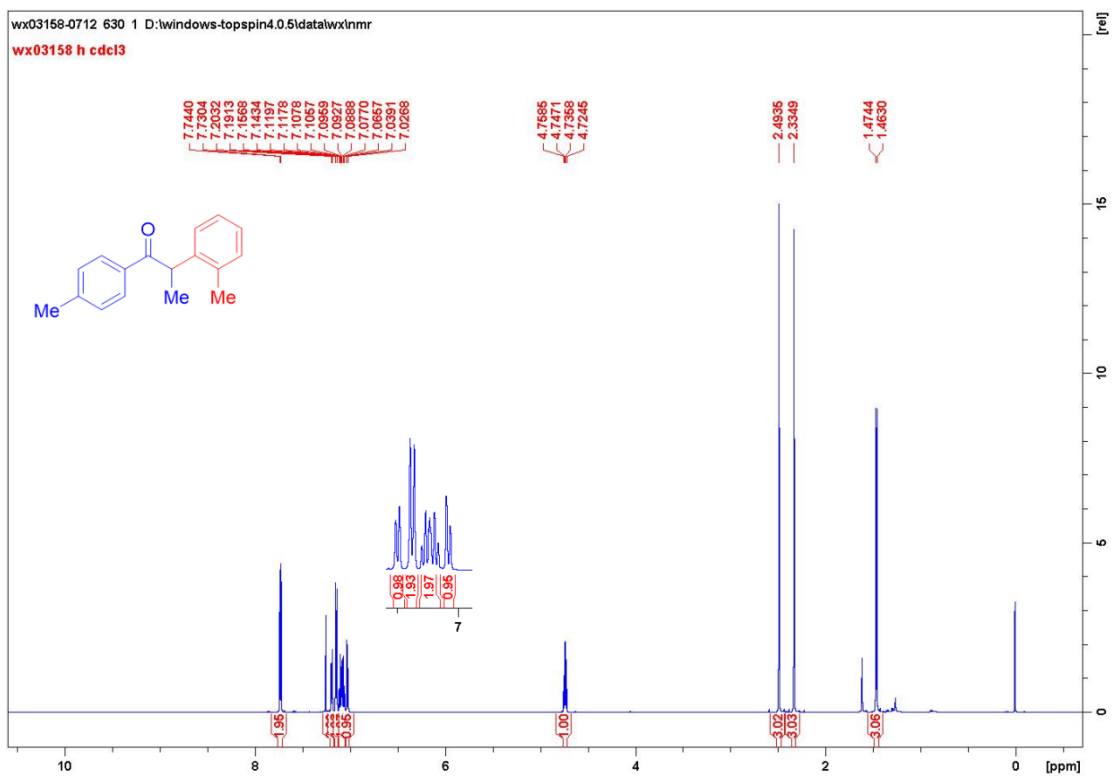

$^1\text{H}$  NMR (600 MHz,  $\text{CDCl}_3$ ) spectrum of **3b**.

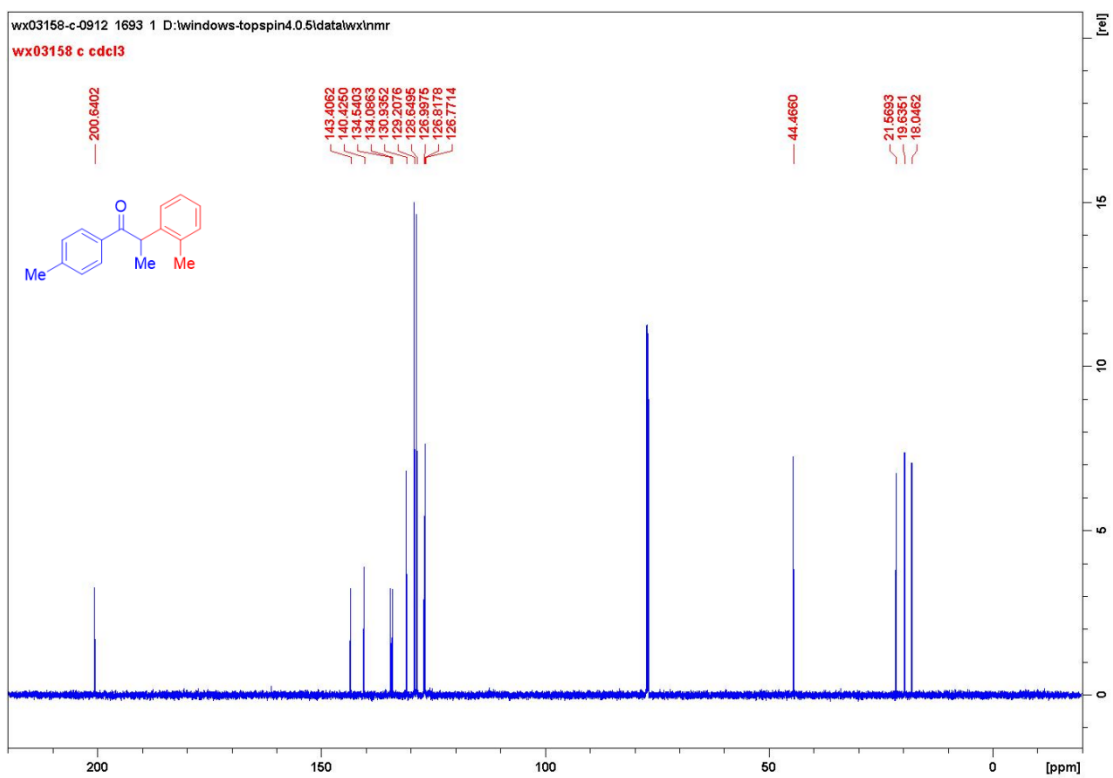

$^{13}\text{C}$  NMR ( $\text{CDCl}_3$ , 150 MHz) spectrum of **3b**.

样品 1: C<sub>17</sub>H<sub>18</sub>O  
 离子源: ESI Positive  
 仪器: AB Sciex Triple TOF 5600+  
 离子模式: 正离子模式

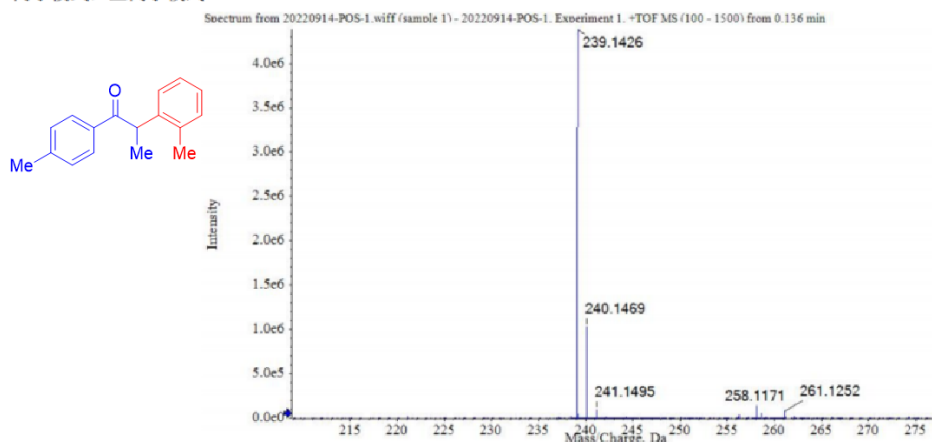

| Name | Formula                           | Adduct | Extraction Mass | Found At Mass | Error (ppm) |
|------|-----------------------------------|--------|-----------------|---------------|-------------|
| 1    | C <sub>17</sub> H <sub>18</sub> O | +H     | 239.1430        | 239.1426      | -1.5        |

HR-MS (ESI) spectra of **3b**.

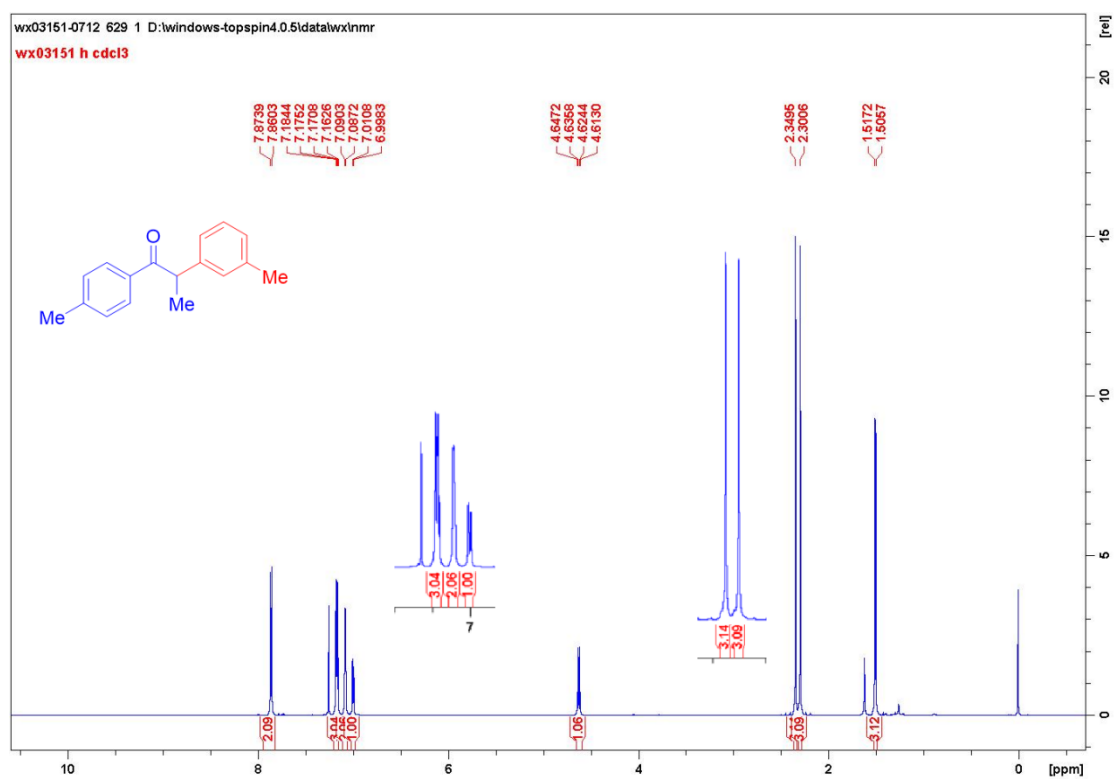

<sup>1</sup>H NMR (600 MHz, CDCl<sub>3</sub>) spectrum of **3c**.

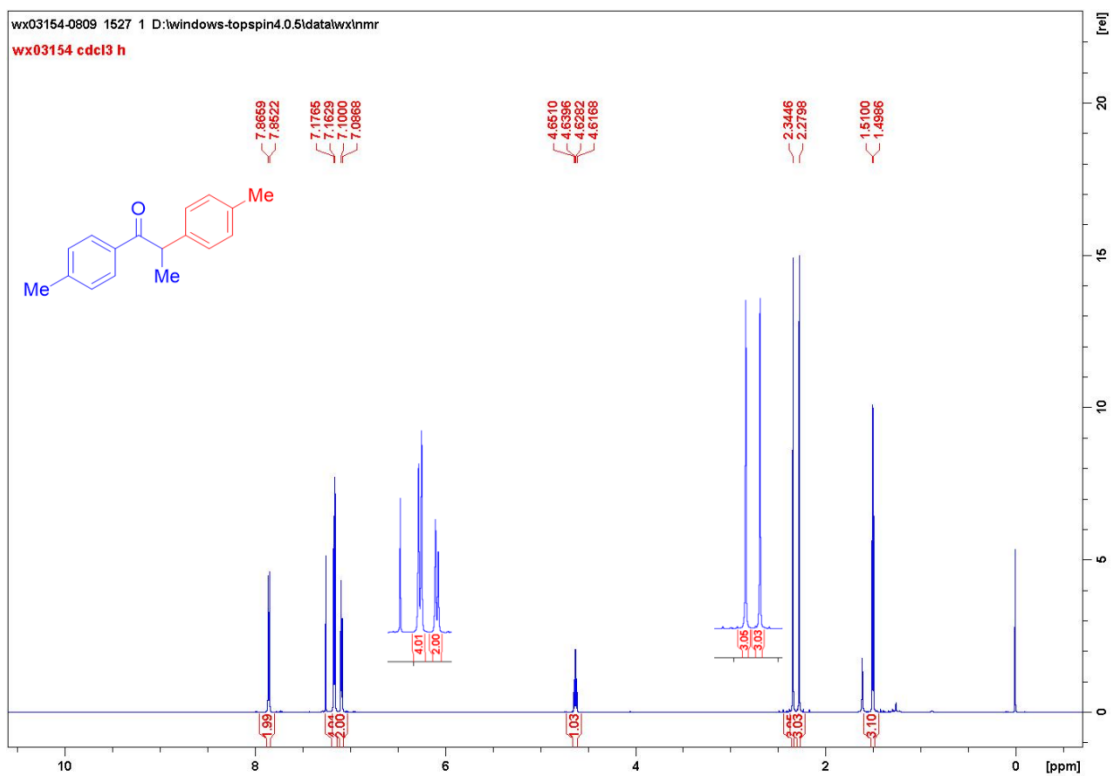

$^1\text{H}$  NMR (600 MHz,  $\text{CDCl}_3$ ) spectrum of **3d**.

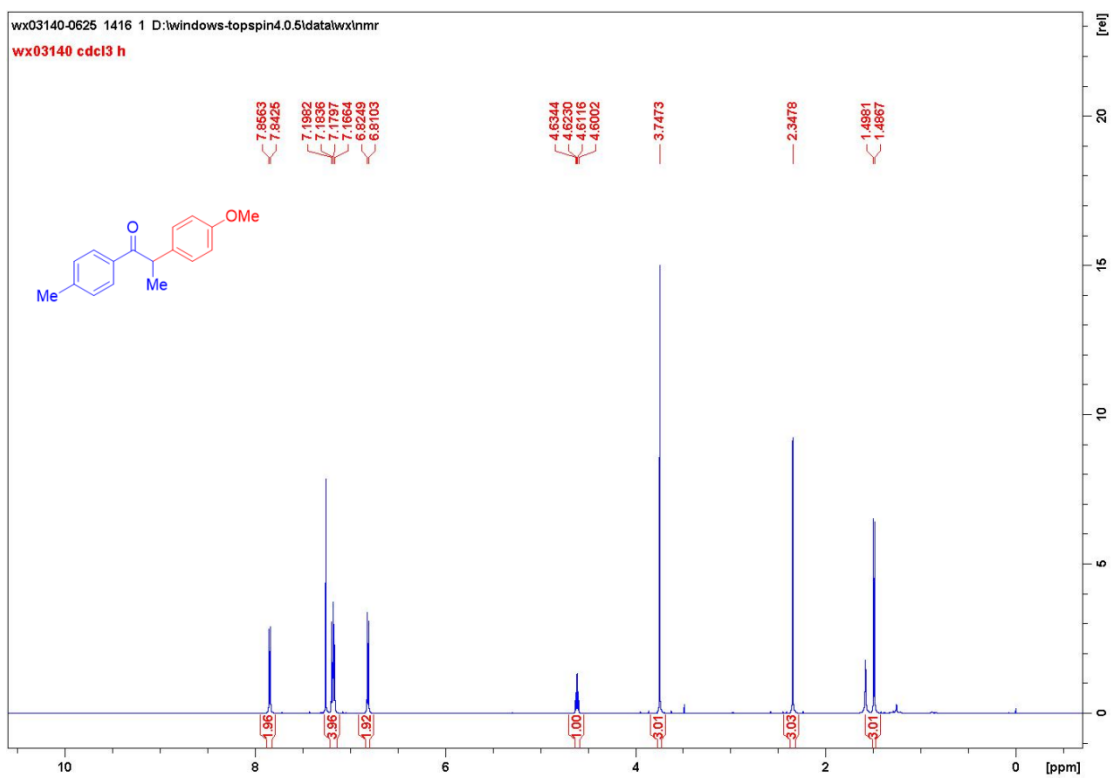

$^1\text{H}$  NMR (600 MHz,  $\text{CDCl}_3$ ) spectrum of **3e**.



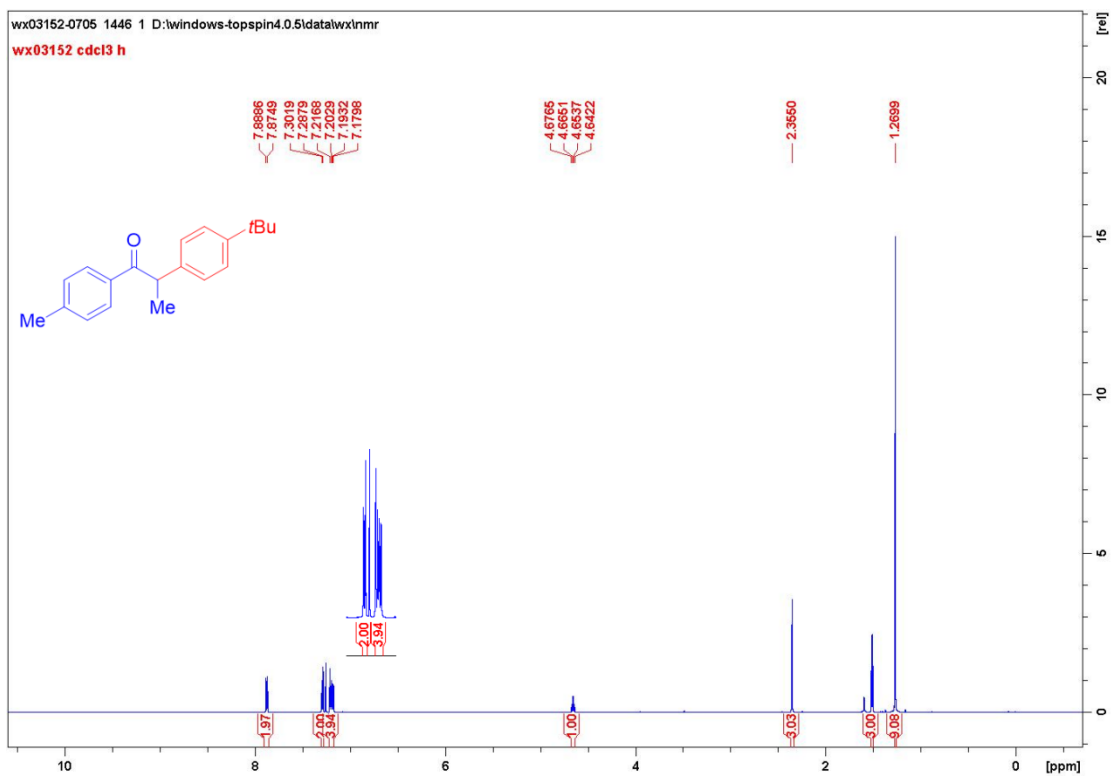

$^1\text{H}$  NMR (600 MHz,  $\text{CDCl}_3$ ) spectrum of **3f**.

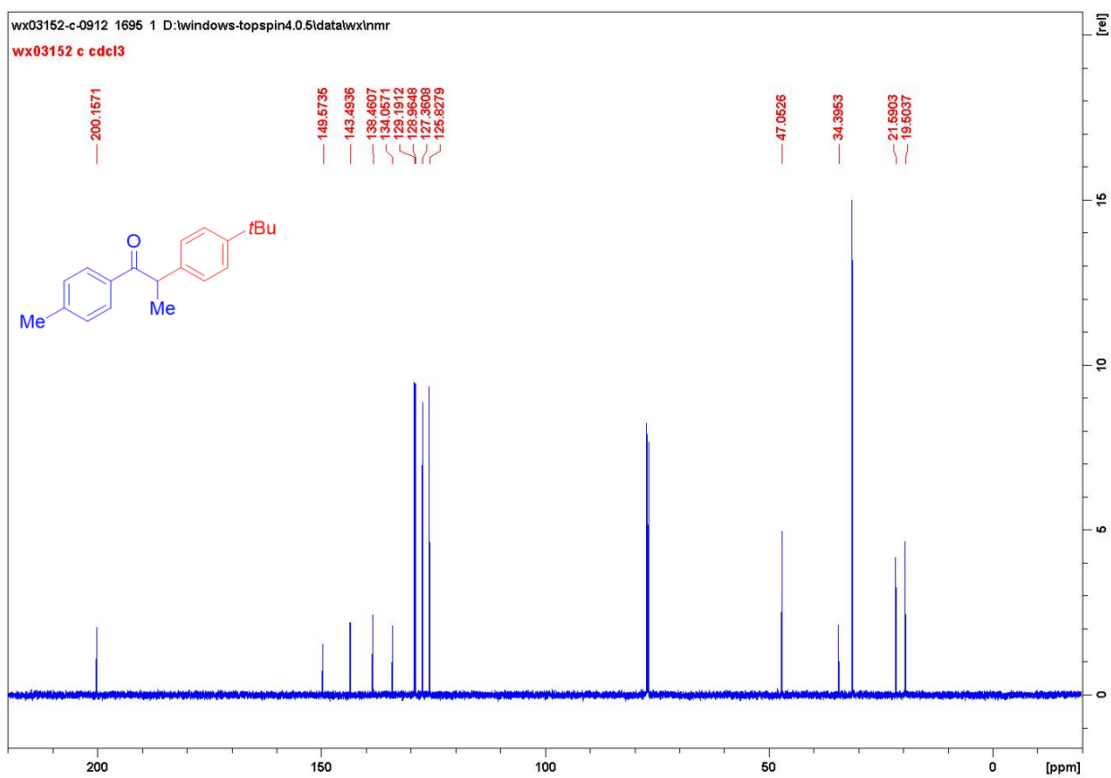

$^{13}\text{C}$  NMR ( $\text{CDCl}_3$ , 150 MHz) spectrum of **3f**.

样品 4: C<sub>20</sub>H<sub>24</sub>O  
 离子源: ESI Positive  
 仪器: AB Sciex Triple TOF 5600+  
 离子模式: 正离子模式

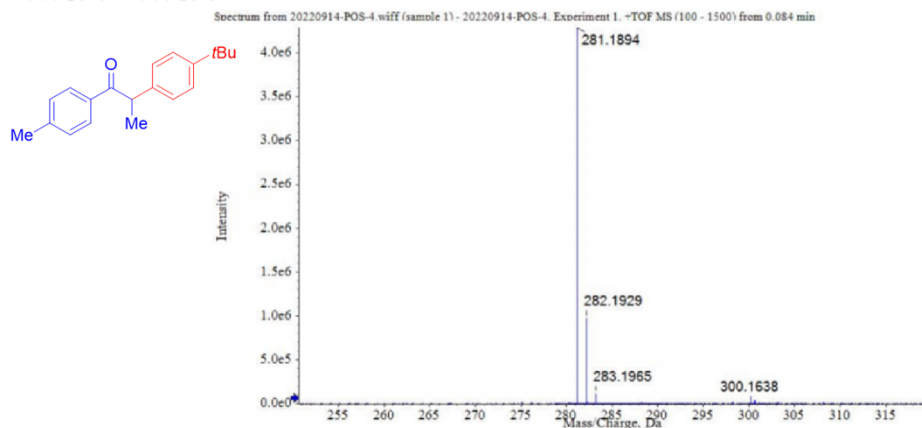

| Name | Formula                           | Adduct | Extraction Mass | Found At Mass | Error (ppm) |
|------|-----------------------------------|--------|-----------------|---------------|-------------|
| 4    | C <sub>20</sub> H <sub>24</sub> O | +H     | 281.1900        | 281.1894      | -2.4        |

HR-MS (ESI) spectra of **3f**.

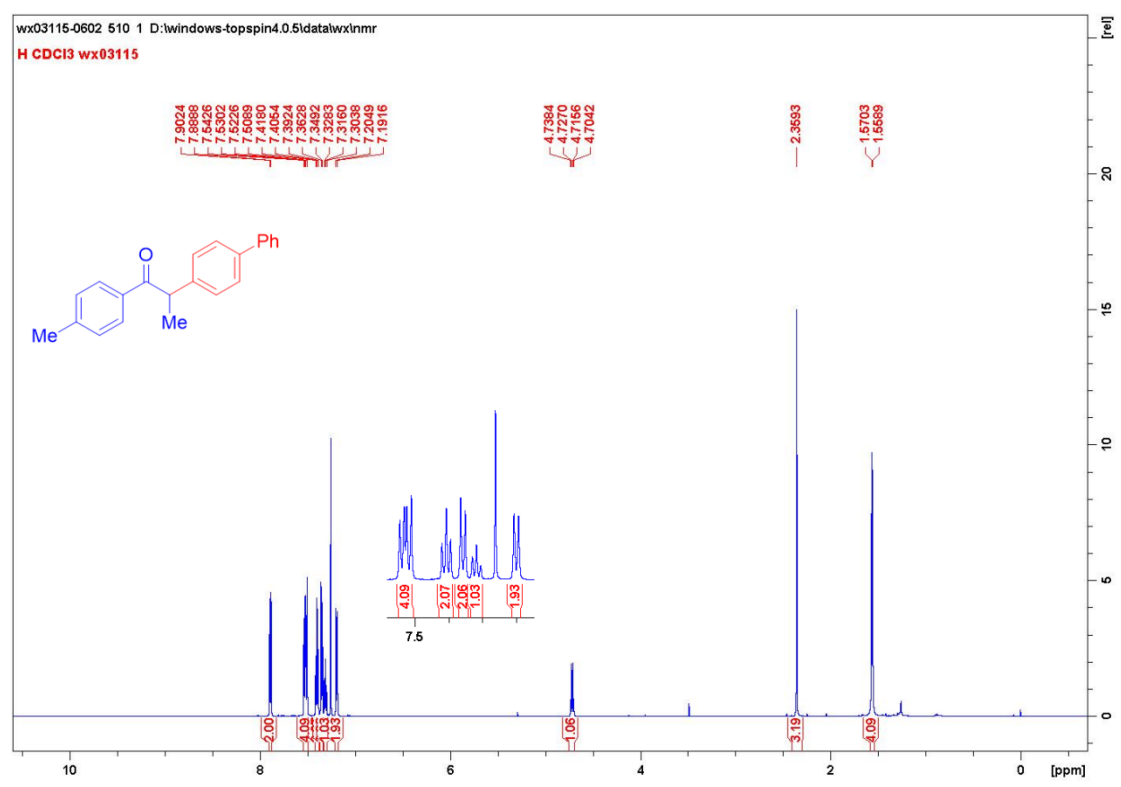

<sup>1</sup>H NMR (600 MHz, CDCl<sub>3</sub>) spectrum of **3g**.

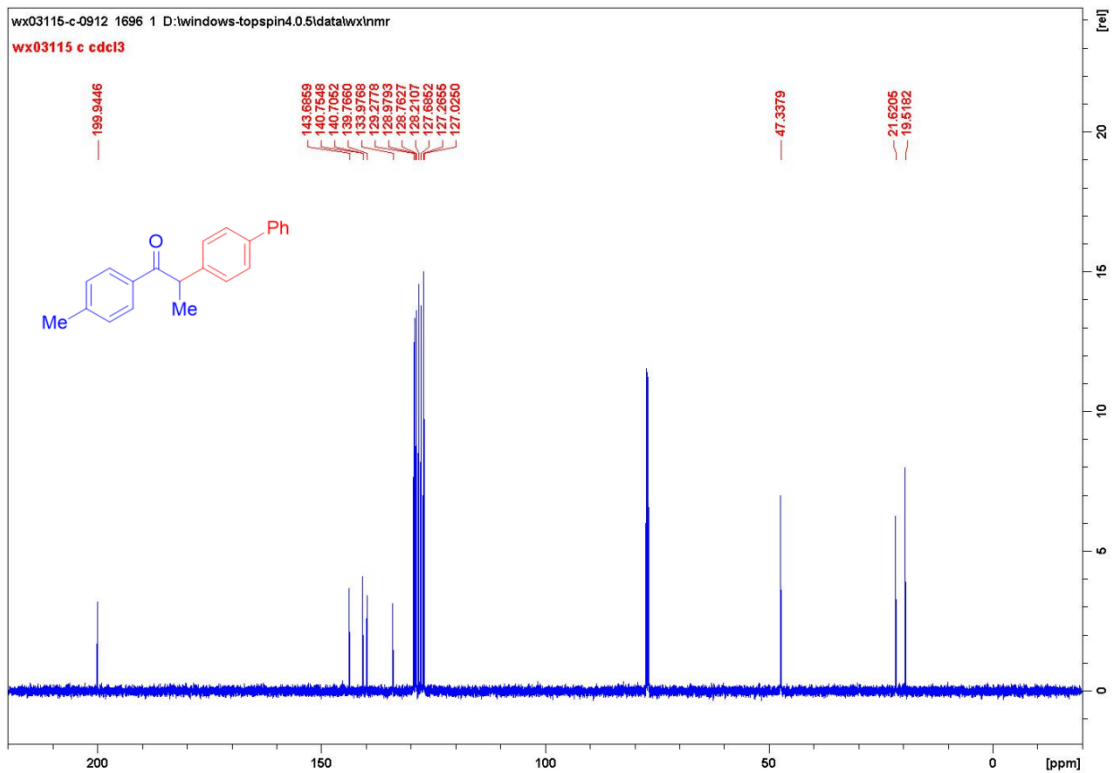

$^{13}\text{C}$  NMR ( $\text{CDCl}_3$ , 150 MHz) spectrum of **3g**.

样品 5: C<sub>22</sub>H<sub>20</sub>O

离子源: ESI Positive

仪器: AB Sciex Triple TOF 5600+

离子模式: 正离子模式

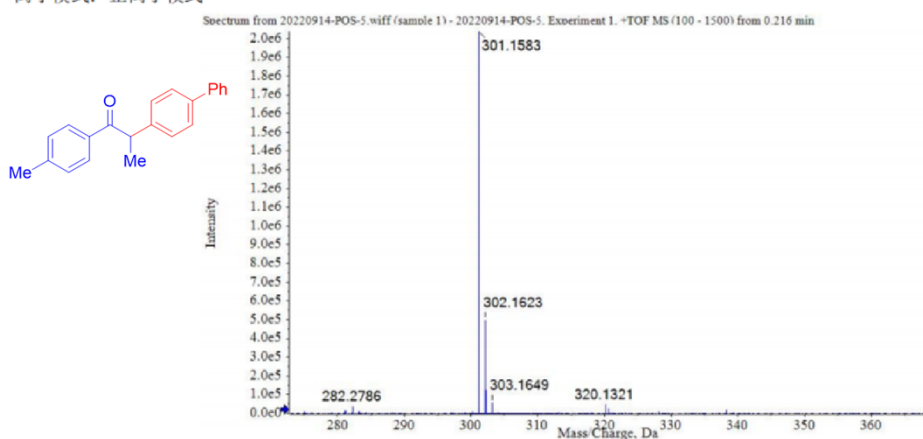

HR-MS (ESI) spectra of **3g**.

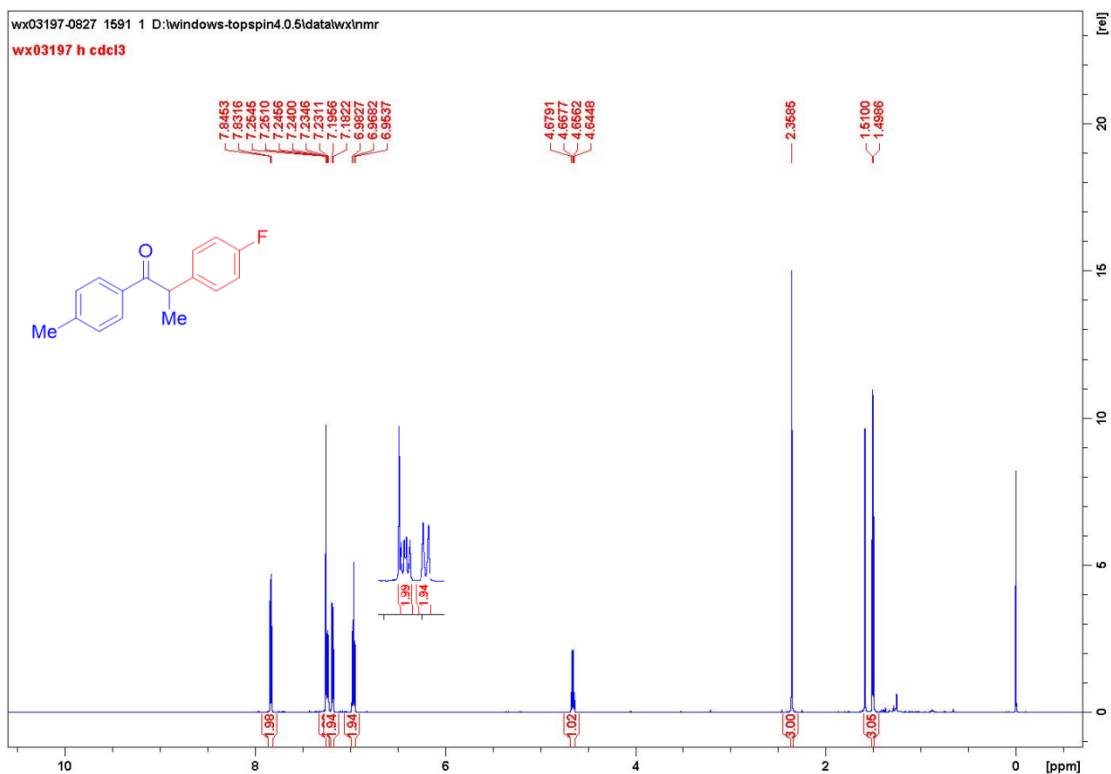

$^1\text{H}$  NMR (400 MHz,  $\text{CDCl}_3$ ) spectrum of **3h**.

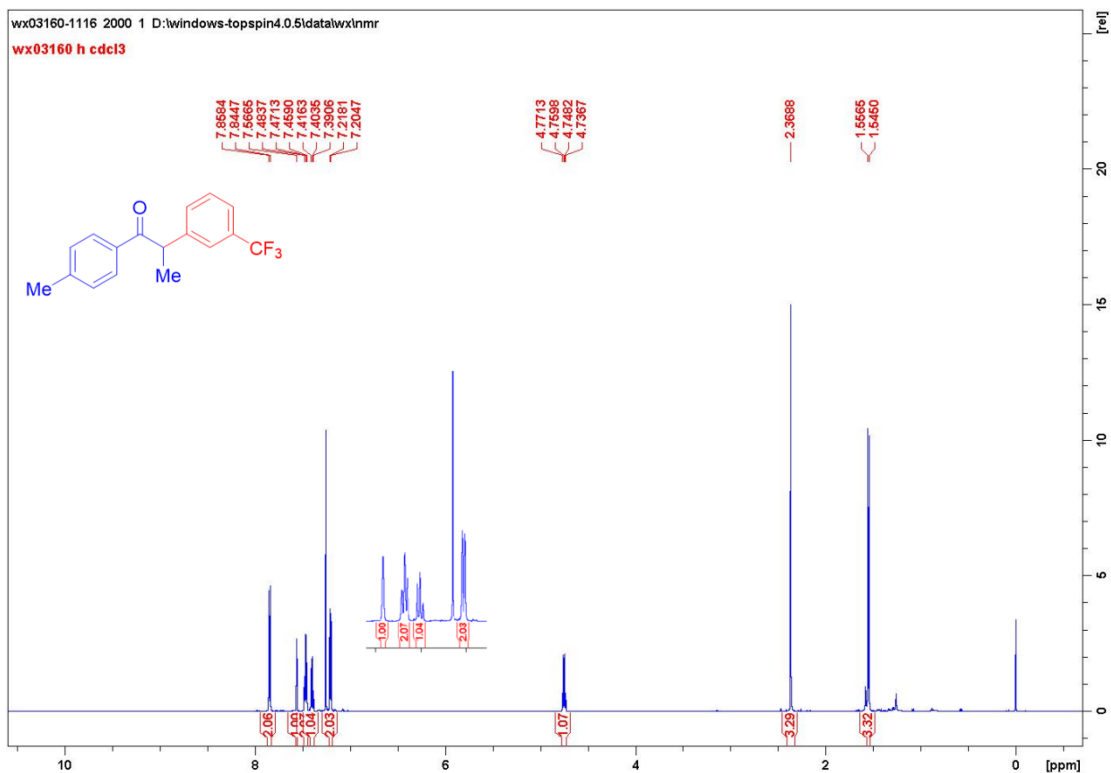

$^1\text{H}$  NMR (600 MHz,  $\text{CDCl}_3$ ) spectrum of **3i**.

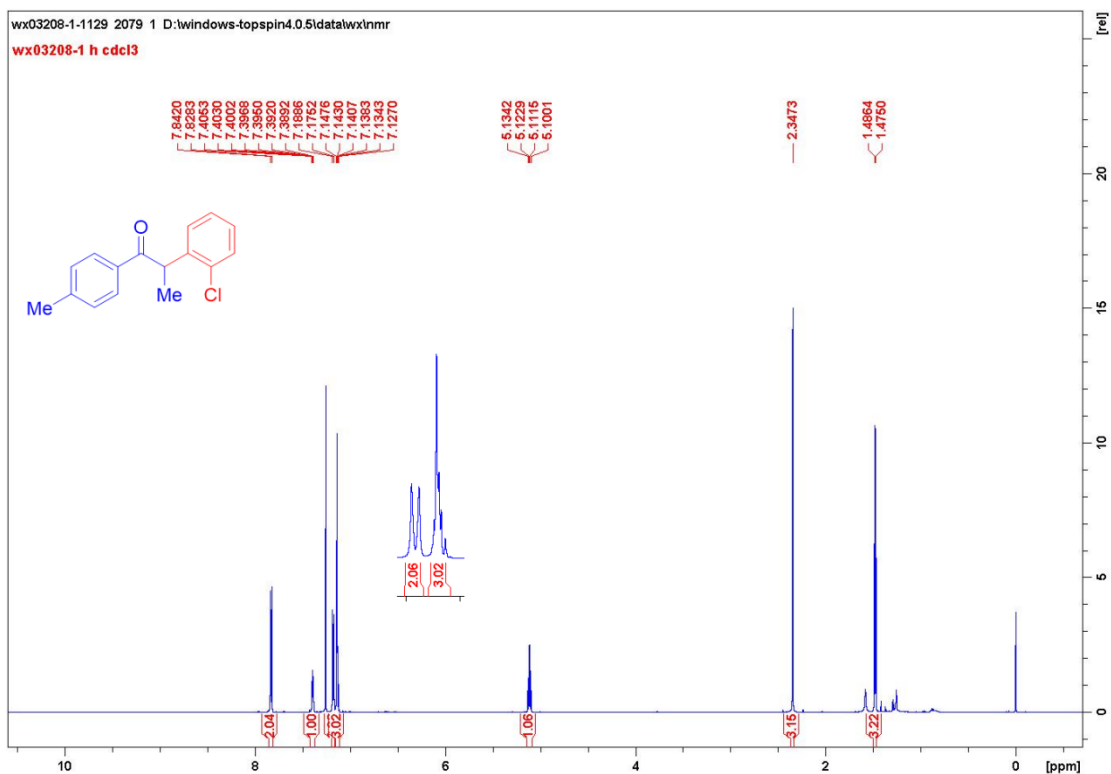

$^1\text{H}$  NMR (600 MHz,  $\text{CDCl}_3$ ) spectrum of **3j**.

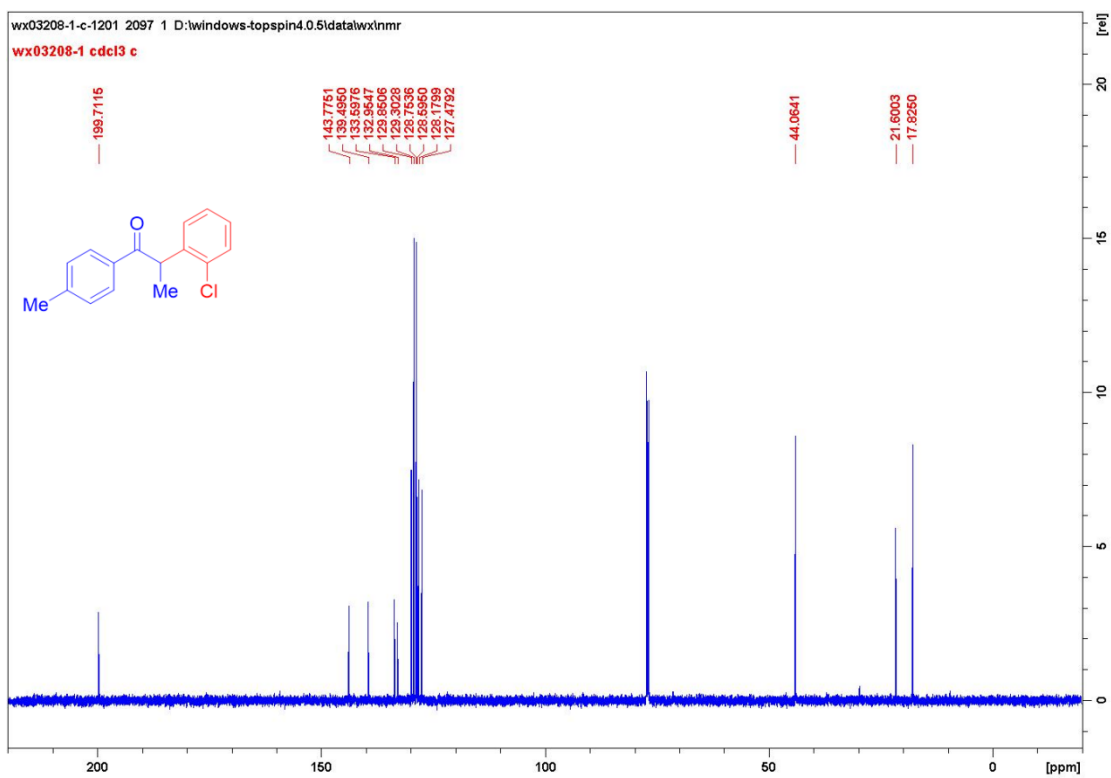

$^{13}\text{C}$  NMR ( $\text{CDCl}_3$ , 150 MHz) spectrum of **3j**.



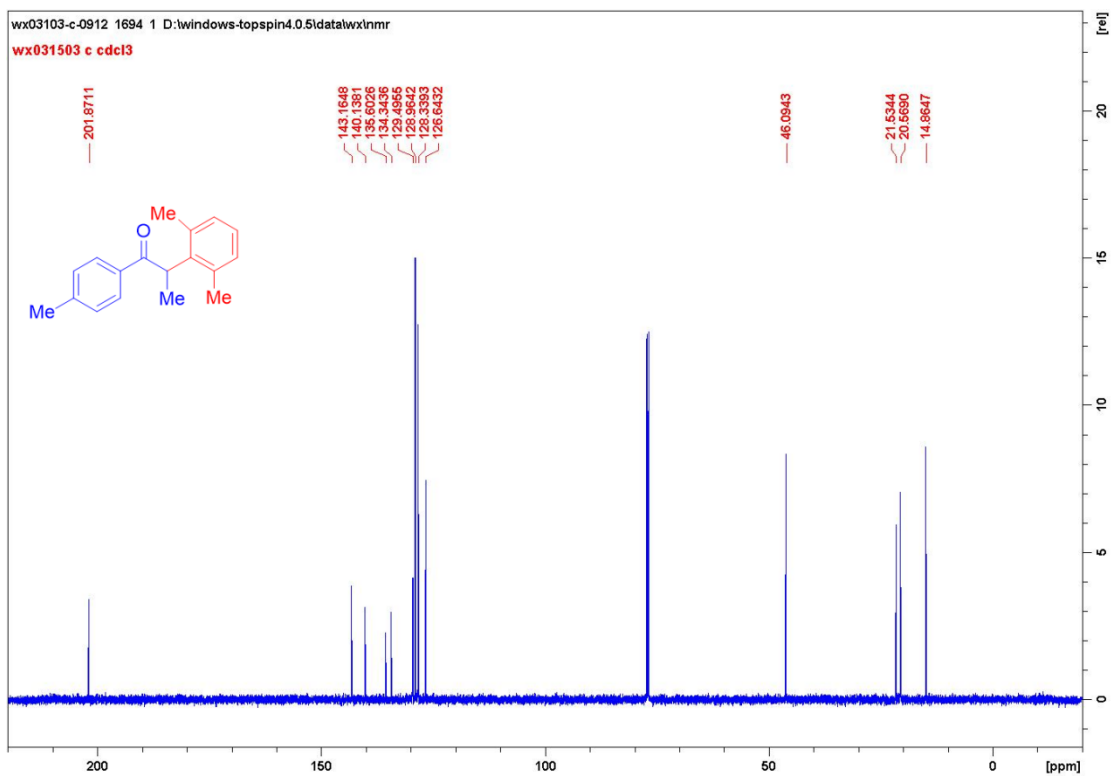

$^{13}\text{C}$  NMR ( $\text{CDCl}_3$ , 150 MHz) spectrum of **3k**.

样品 2: C<sub>18</sub>H<sub>20</sub>O  
离子源: ESI Positive  
仪器: AB Sciex Triple TOF 5600+  
离子模式: 正离子模式

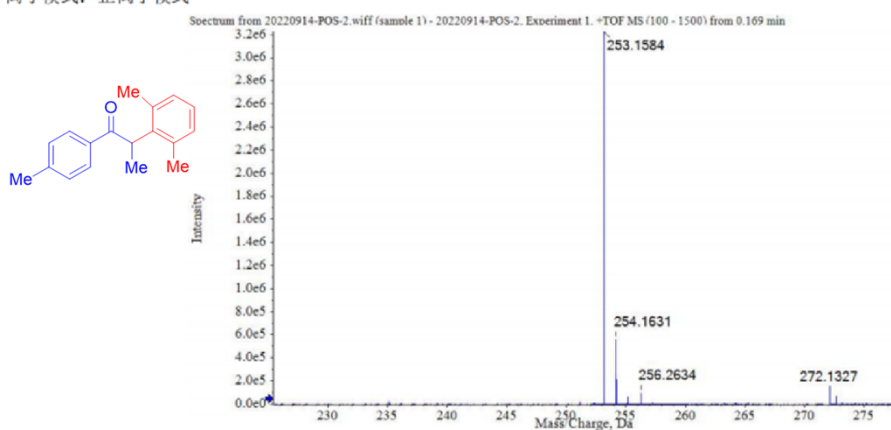

| Name | Formula                           | Adduct | Extraction Mass | Found At Mass | Error (ppm) |
|------|-----------------------------------|--------|-----------------|---------------|-------------|
| 2    | C <sub>18</sub> H <sub>20</sub> O | +H     | 253.1587        | 253.1584      | -0.9        |

HR-MS (ESI) spectra of **3k**.

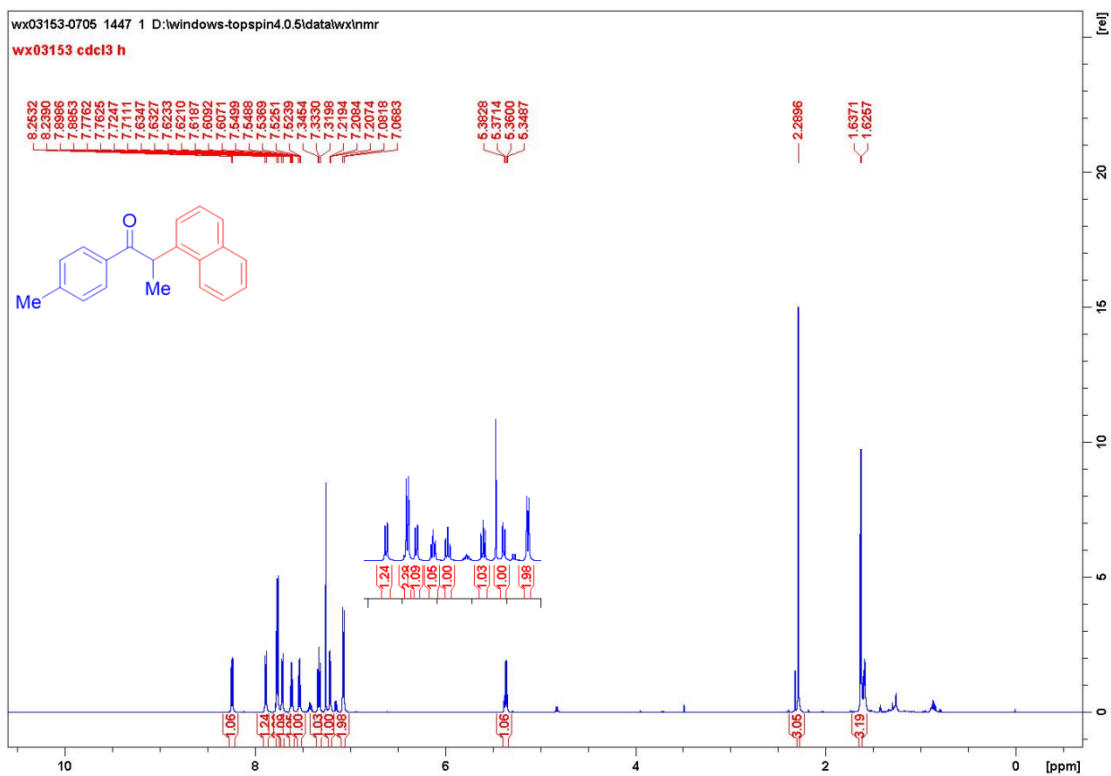

$^1\text{H}$  NMR (600 MHz,  $\text{CDCl}_3$ ) spectrum of **3I**.

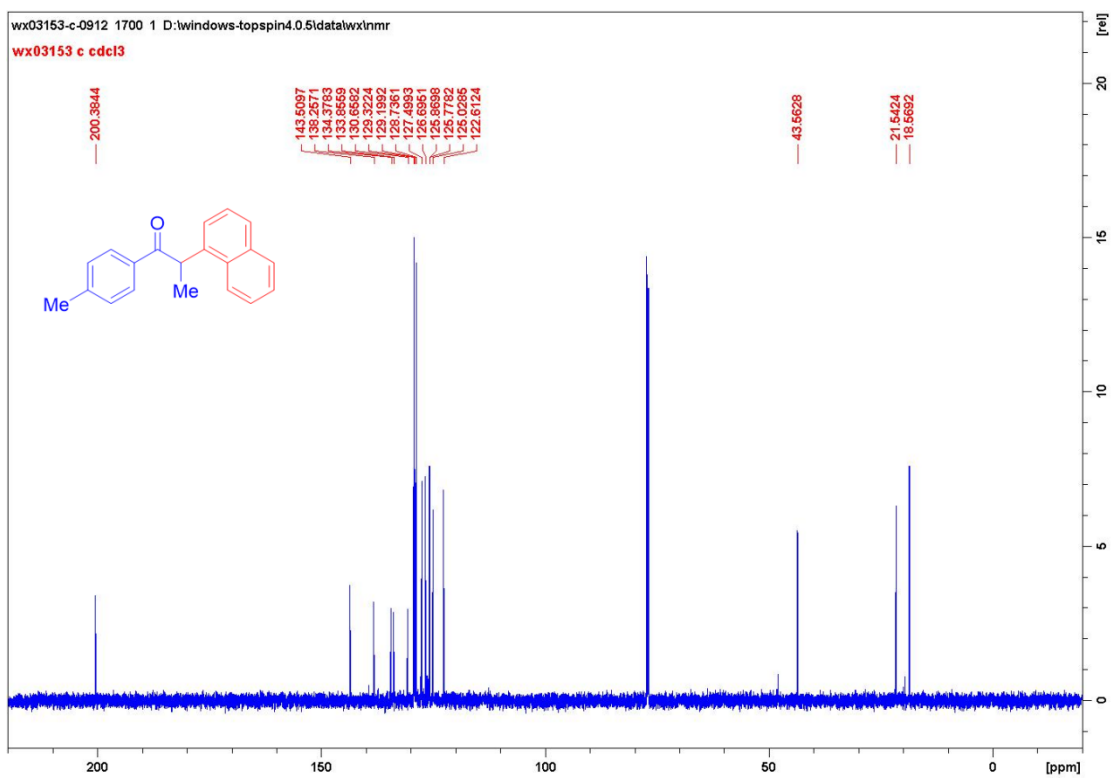

$^{13}\text{C}$  NMR ( $\text{CDCl}_3$ , 150 MHz) spectrum of **3I**.



样品 3: C<sub>20</sub>H<sub>18</sub>O  
 离子源: ESI Positive  
 仪器: AB Sciex Triple TOF 5600+  
 离子模式: 正离子模式

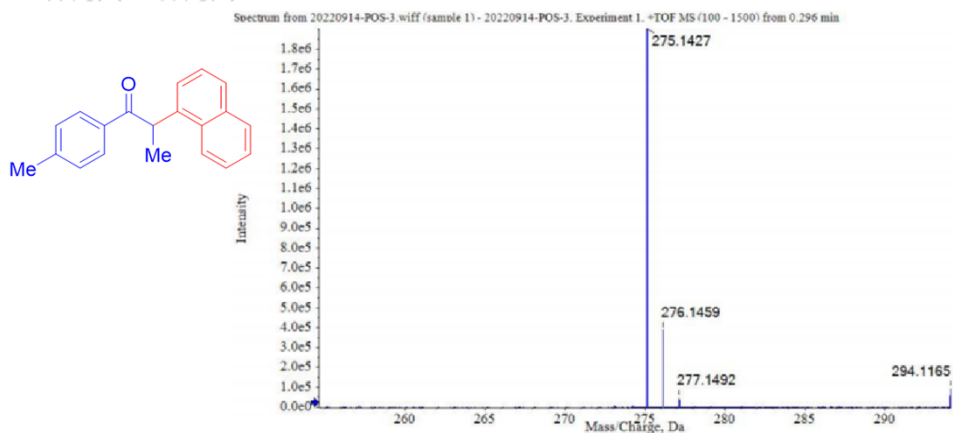

| Name | Formula                           | Adduct | Extraction Mass | Found At Mass | Error (ppm) |
|------|-----------------------------------|--------|-----------------|---------------|-------------|
| 3    | C <sub>20</sub> H <sub>18</sub> O | +H     | 275.1430        | 275.1427      | -1.4        |

HR-MS (ESI) spectra of **3l**.

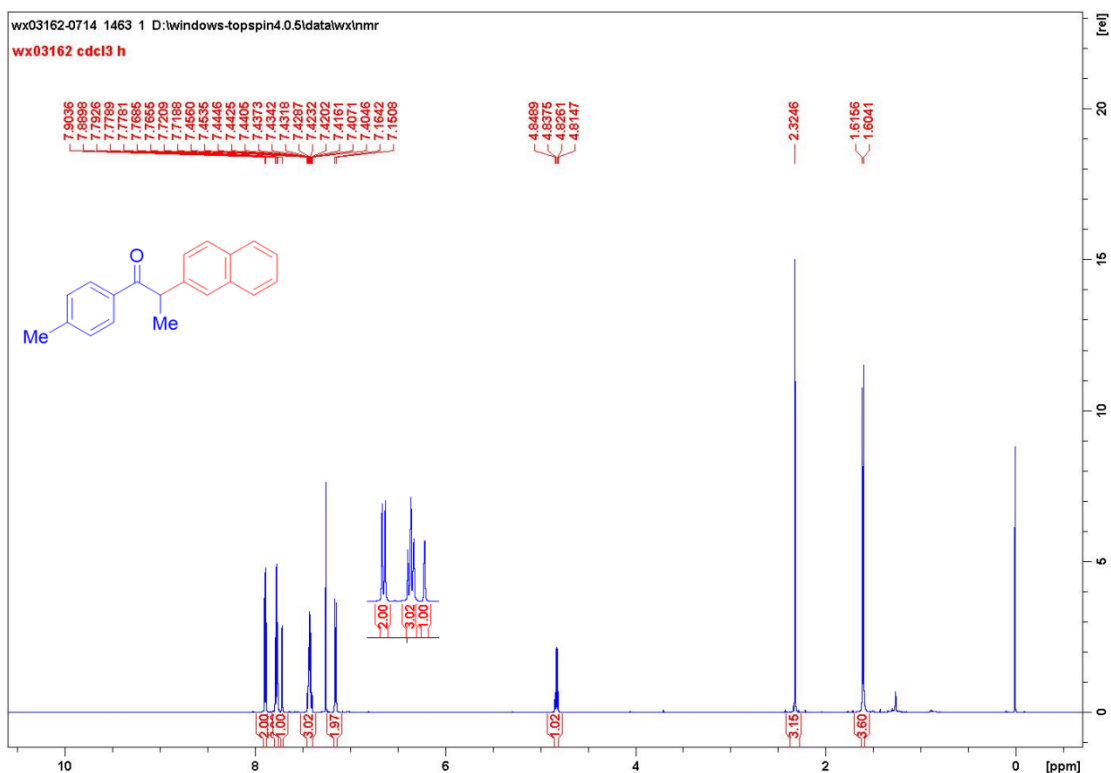

<sup>1</sup>H NMR (600 MHz, CDCl<sub>3</sub>) spectrum of **3m**.

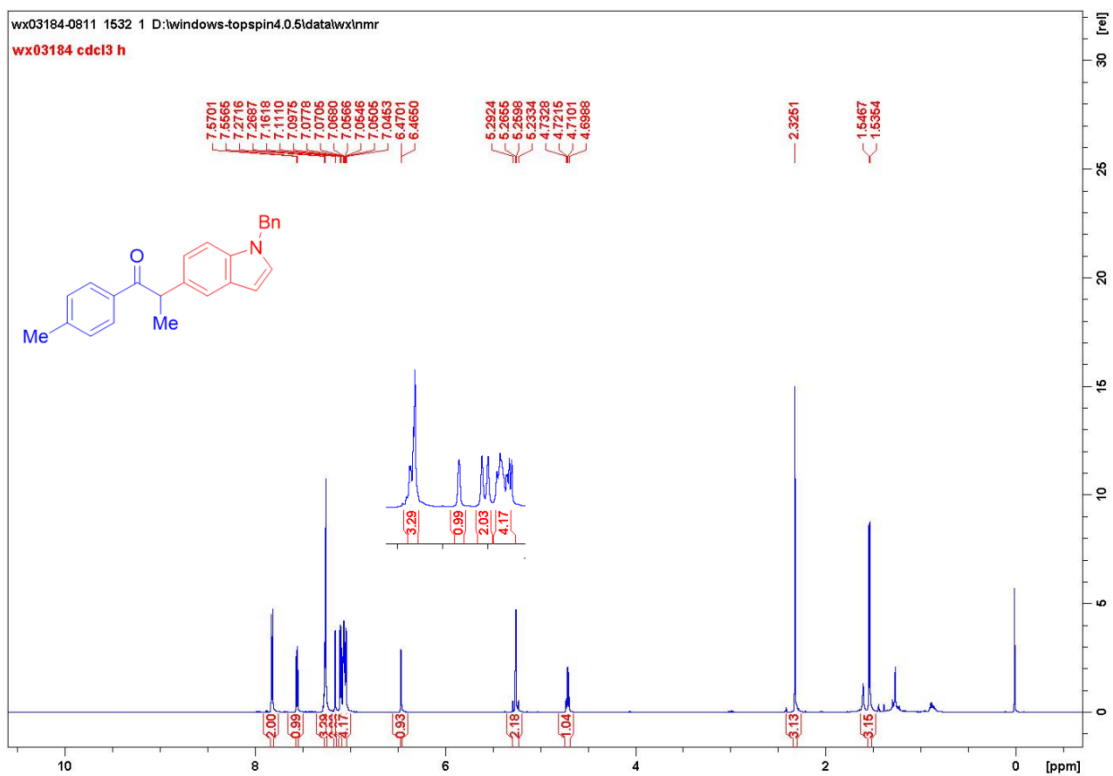

$^1\text{H}$  NMR (600 MHz,  $\text{CDCl}_3$ ) spectrum of **3n**.

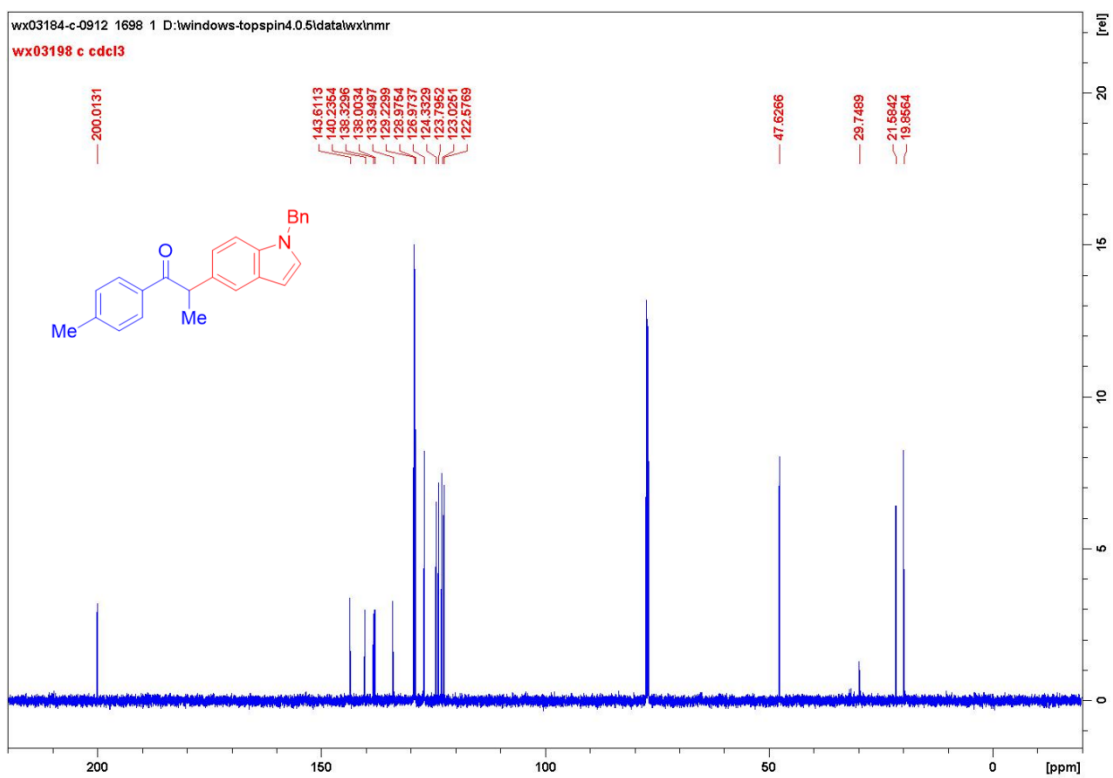

$^{13}\text{C}$  NMR ( $\text{CDCl}_3$ , 150 MHz) spectrum of **3n**.

样品 6: C<sub>25</sub>H<sub>23</sub>NO  
 离子源: ESI Positive  
 仪器: AB Sciex Triple TOF 5600+  
 离子模式: 正离子模式

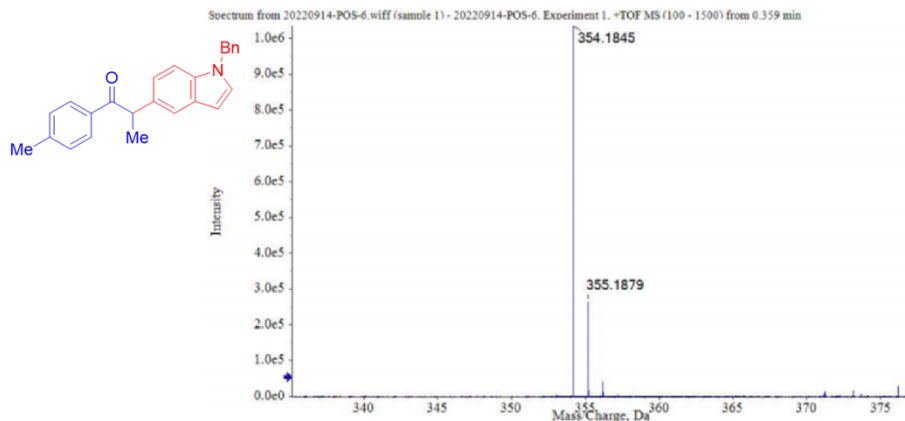

| Name | Formula                            | Adduct | Extraction Mass | Found At Mass | Error (ppm) |
|------|------------------------------------|--------|-----------------|---------------|-------------|
| 6    | C <sub>25</sub> H <sub>23</sub> NO | +H     | 354.1852        | 354.1845      | -2.5        |

HR-MS (ESI) spectra of **3n**.

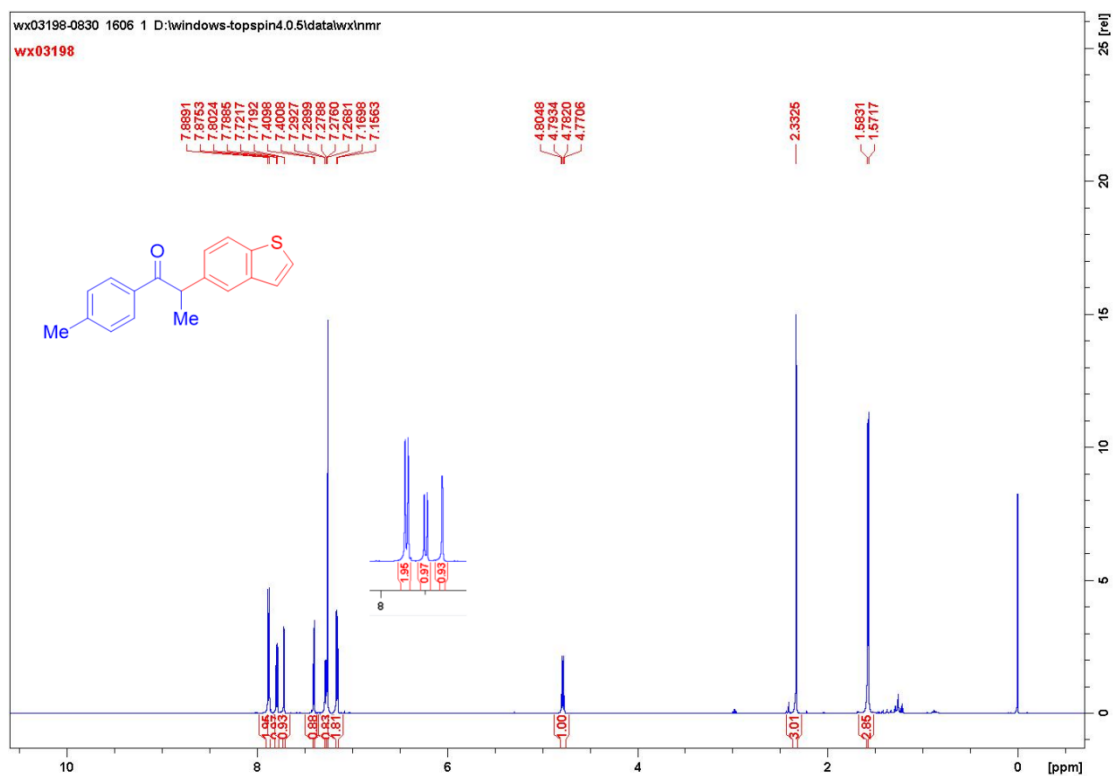

<sup>1</sup>H NMR (600 MHz, CDCl<sub>3</sub>) spectrum of **3o**.

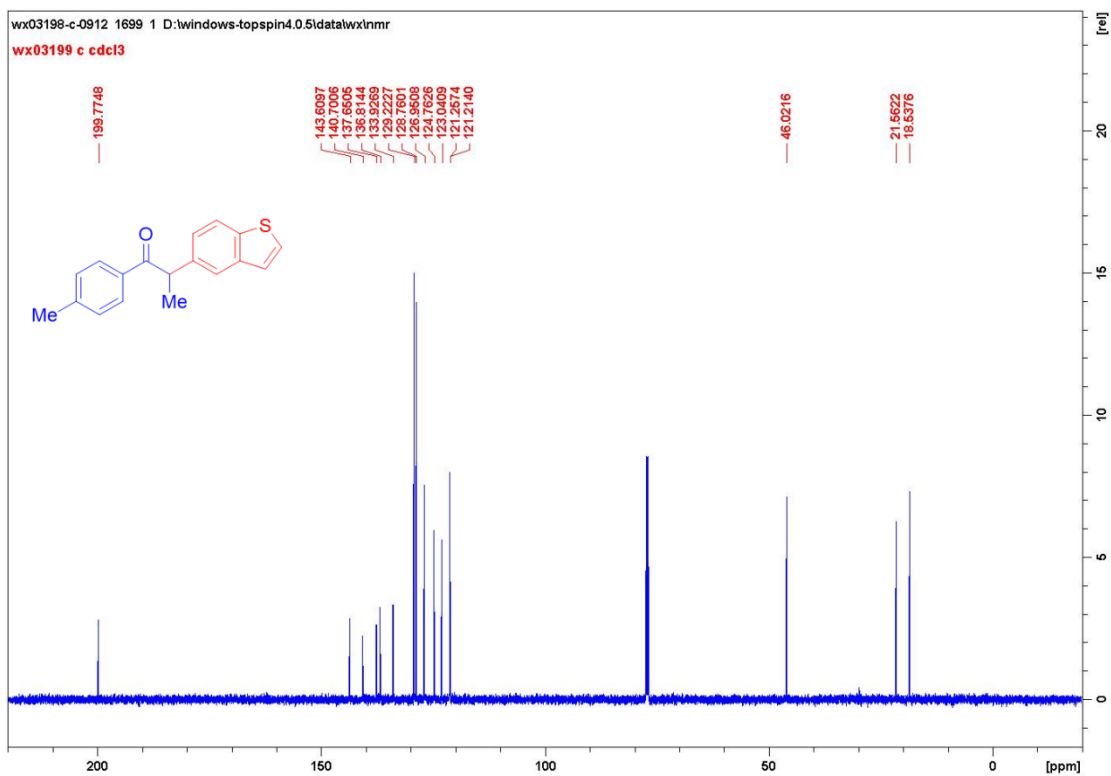

$^{13}\text{C}$  NMR ( $\text{CDCl}_3$ , 150 MHz) spectrum of **30**.

样品 7:  $\text{C}_{18}\text{H}_{16}\text{SO}$   
离子源: ESI Positive  
仪器: AB Sciex Triple TOF 5600+  
离子模式: 正离子模式

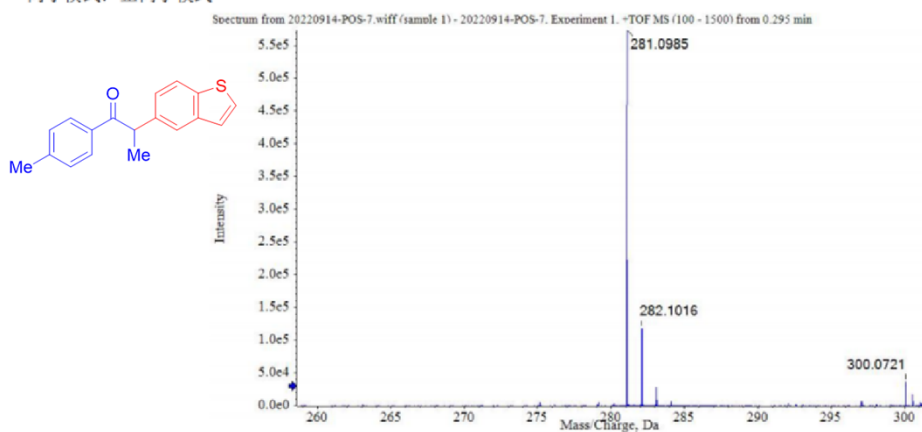

| Name | Formula                               | Adduct | Extraction Mass | Found At Mass | Error (ppm) |
|------|---------------------------------------|--------|-----------------|---------------|-------------|
| 7    | $\text{C}_{18}\text{H}_{16}\text{SO}$ | +H     | 281.0995        | 281.0985      | -3.6        |

HR-MS (ESI) spectra of **30**.

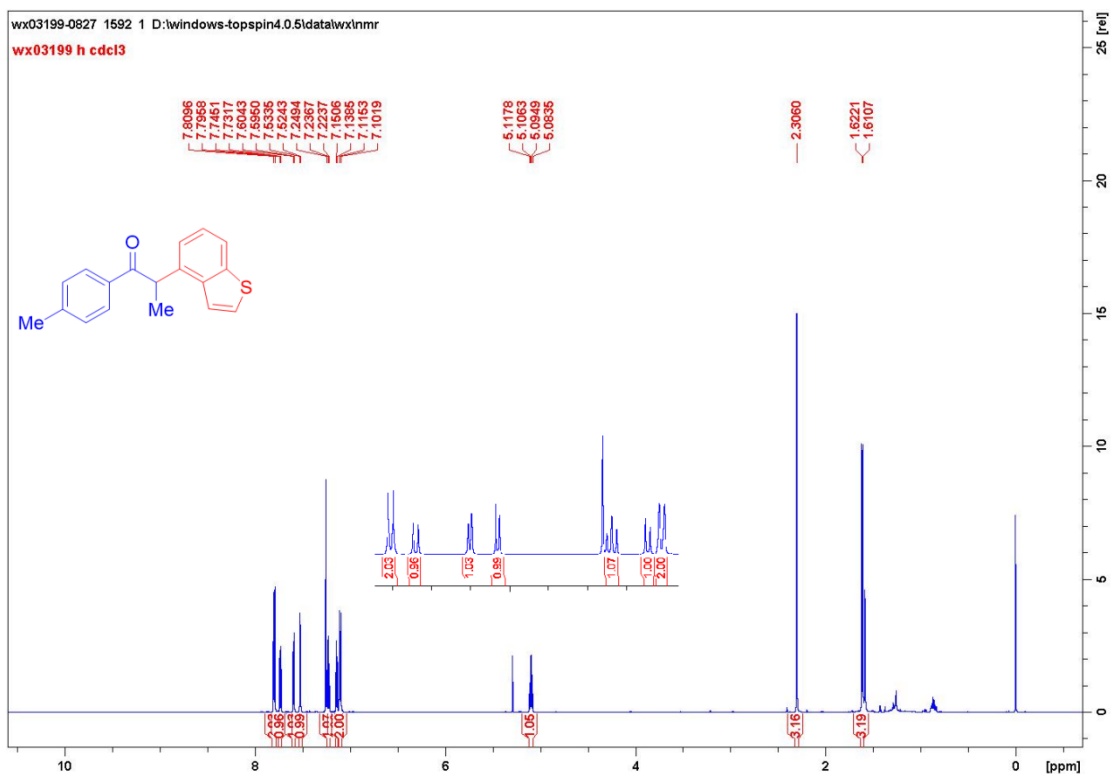

$^1\text{H}$  NMR (600 MHz,  $\text{CDCl}_3$ ) spectrum of **3p**.

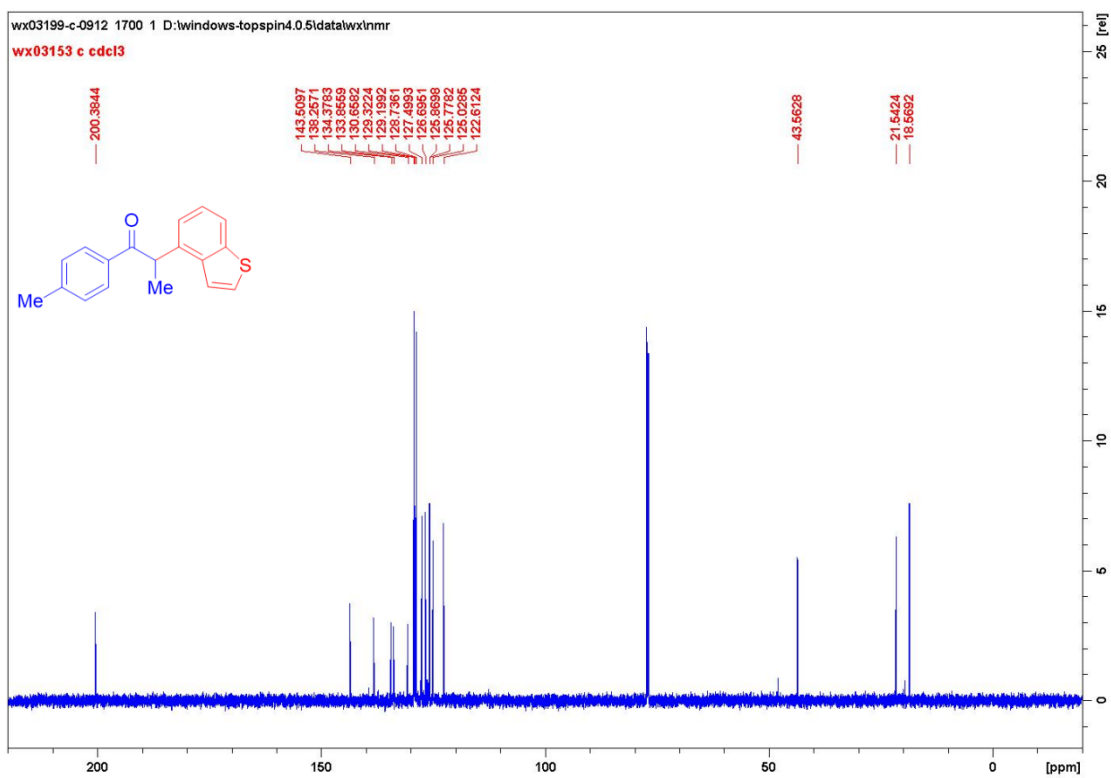

$^{13}\text{C}$  NMR ( $\text{CDCl}_3$ , 150 MHz) spectrum of **3p**.

样品 8: C<sub>18</sub>H<sub>16</sub>SO  
 离子源: ESI Positive  
 仪器: AB Sciex Triple TOF 5600+  
 离子模式: 正离子模式

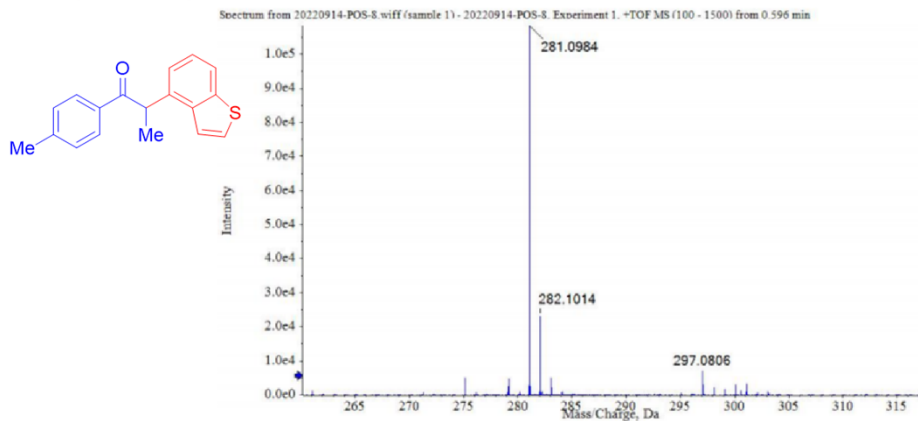

| Name | Formula                            | Adduct | Extraction Mass | Found At Mass | Error (ppm) |
|------|------------------------------------|--------|-----------------|---------------|-------------|
| 8    | C <sub>18</sub> H <sub>16</sub> SO | +H     | 281.0995        | 281.0984      | -3.3        |

HR-MS (ESI) spectra of **3p**.

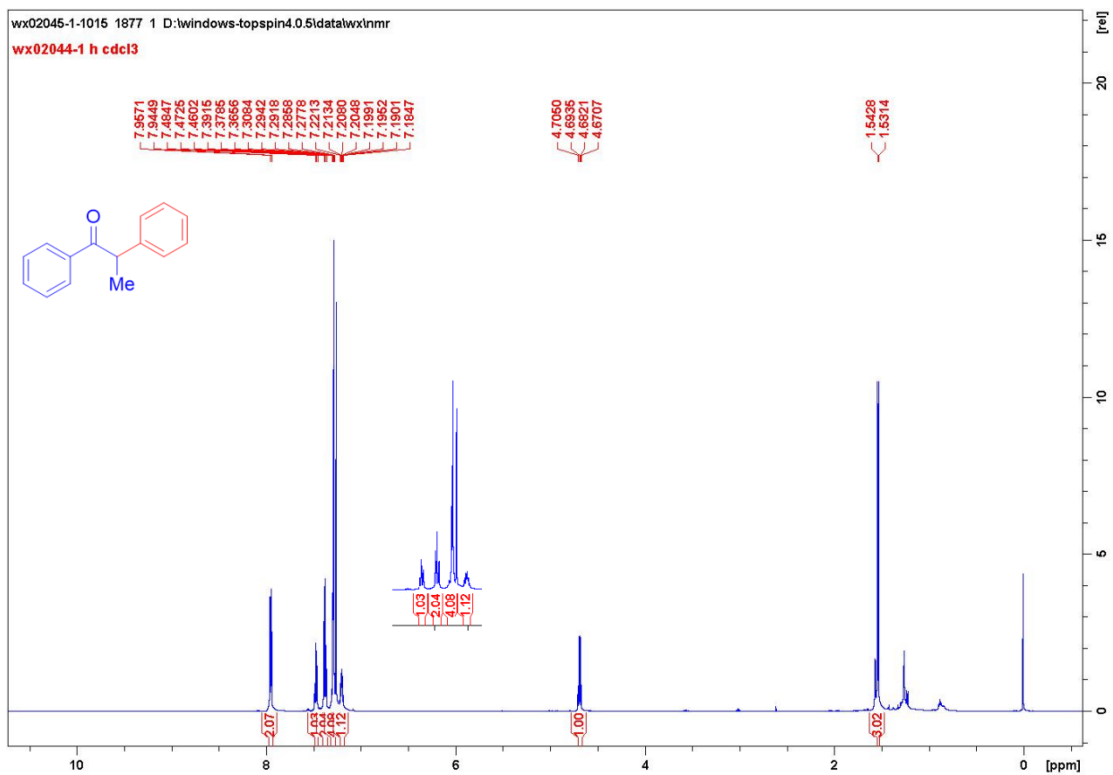

<sup>1</sup>H NMR (400 MHz, CDCl<sub>3</sub>) spectrum of **3q**.

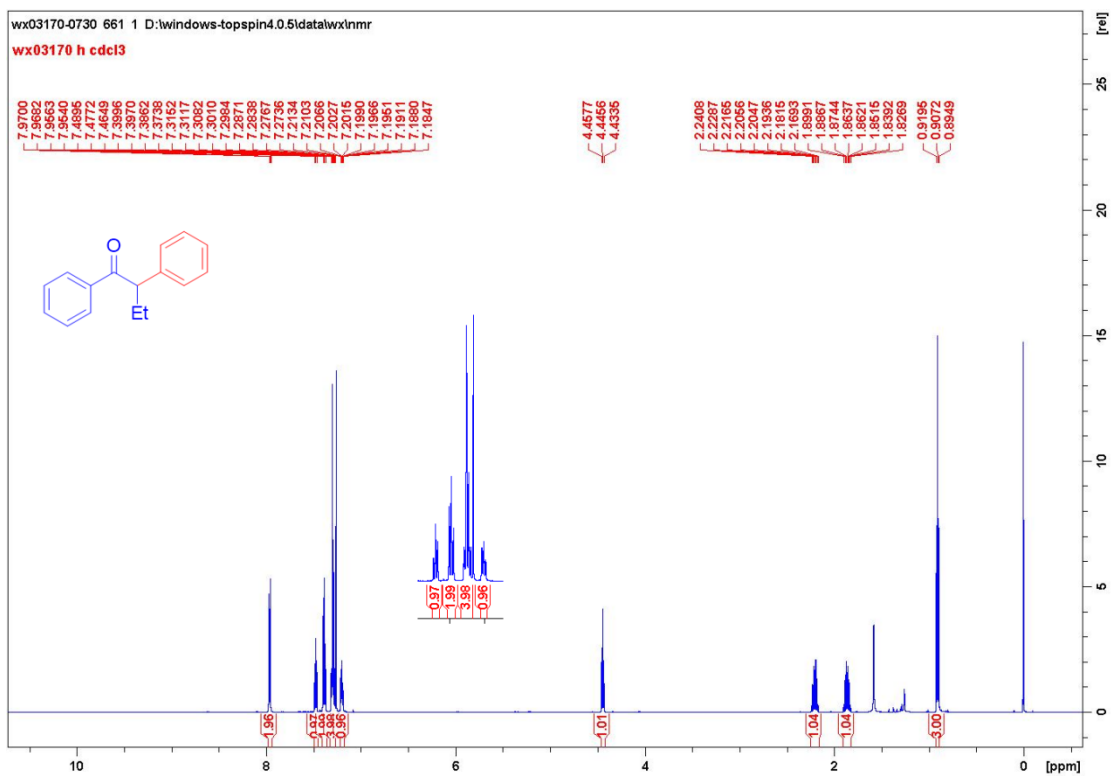

$^1\text{H}$  NMR (600 MHz,  $\text{CDCl}_3$ ) spectrum of **3r**.

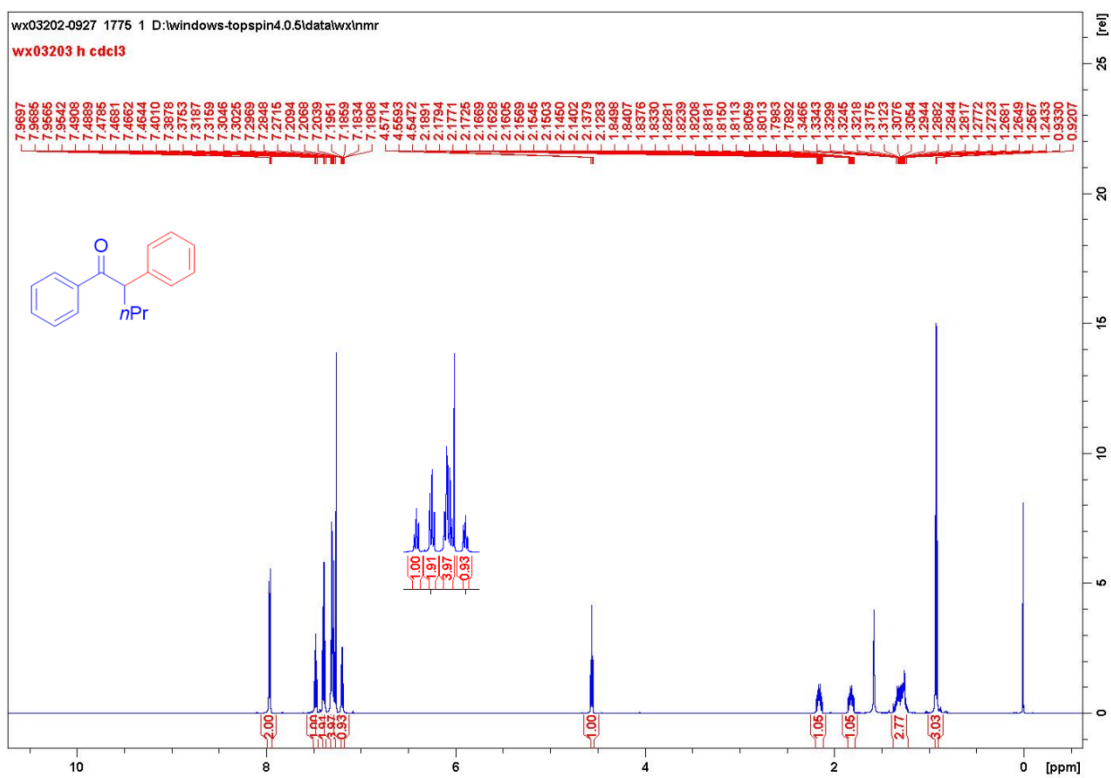

$^1\text{H}$  NMR (600 MHz,  $\text{CDCl}_3$ ) spectrum of **3s**.

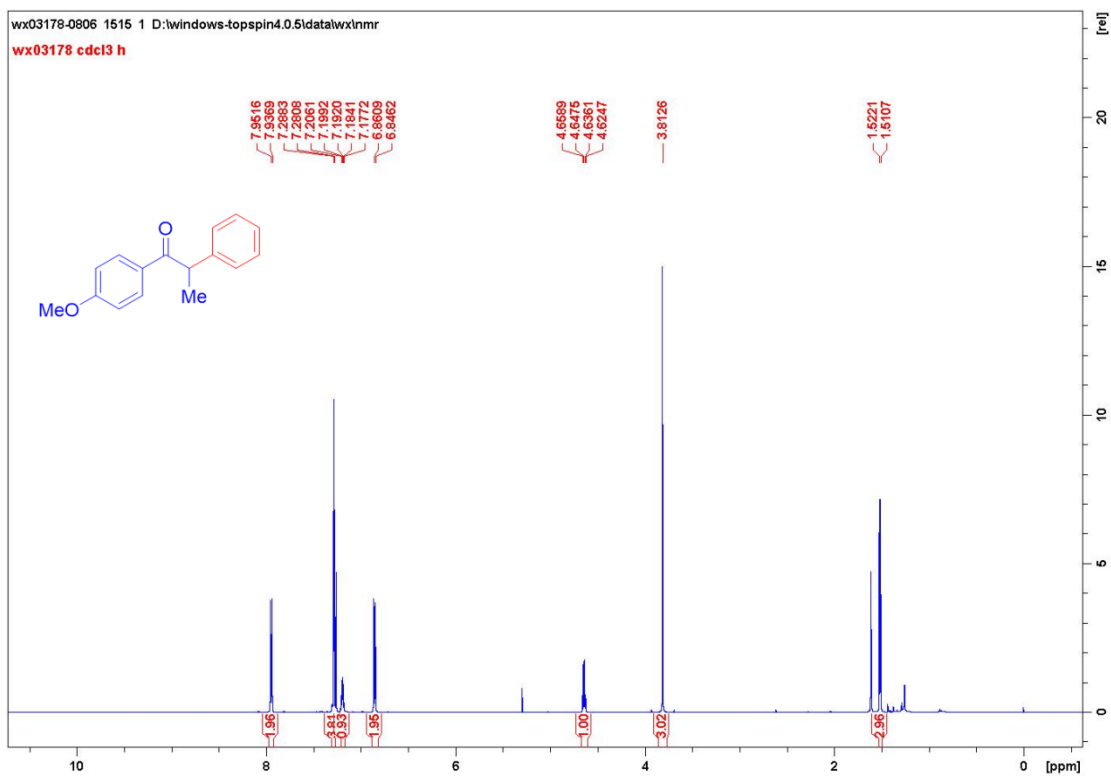

$^1\text{H}$  NMR (600 MHz,  $\text{CDCl}_3$ ) spectrum of **3t**.

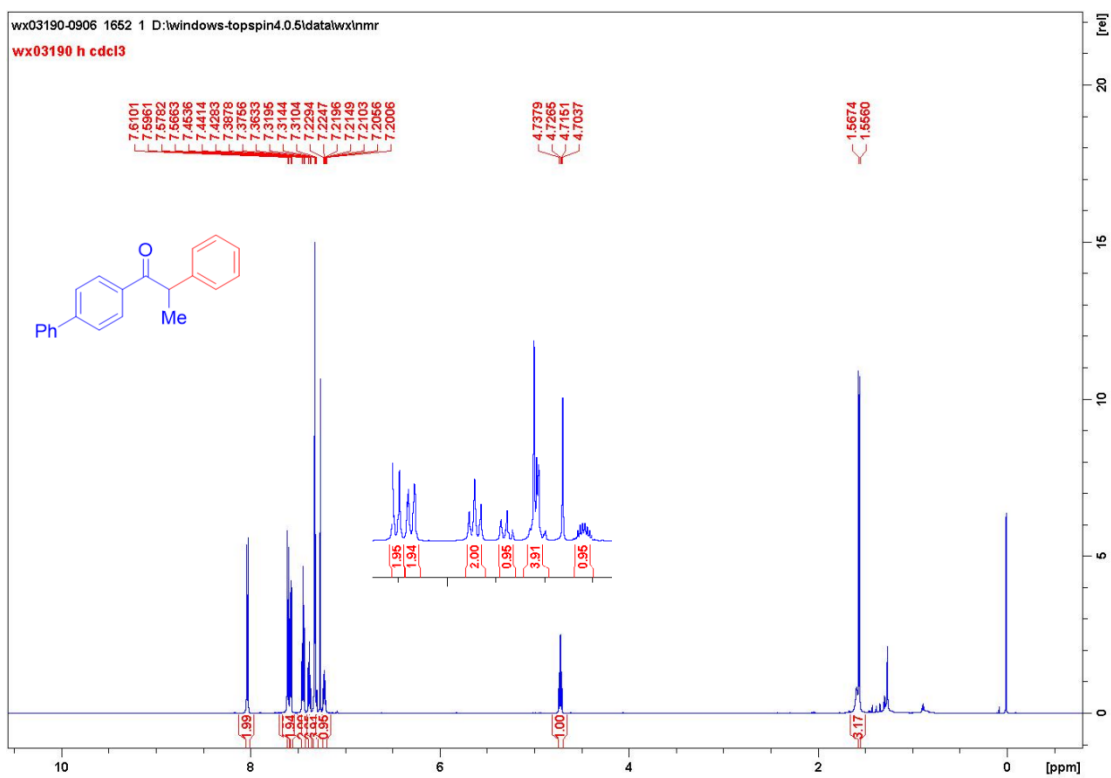

$^1\text{H}$  NMR (600 MHz,  $\text{CDCl}_3$ ) spectrum of **3u**.



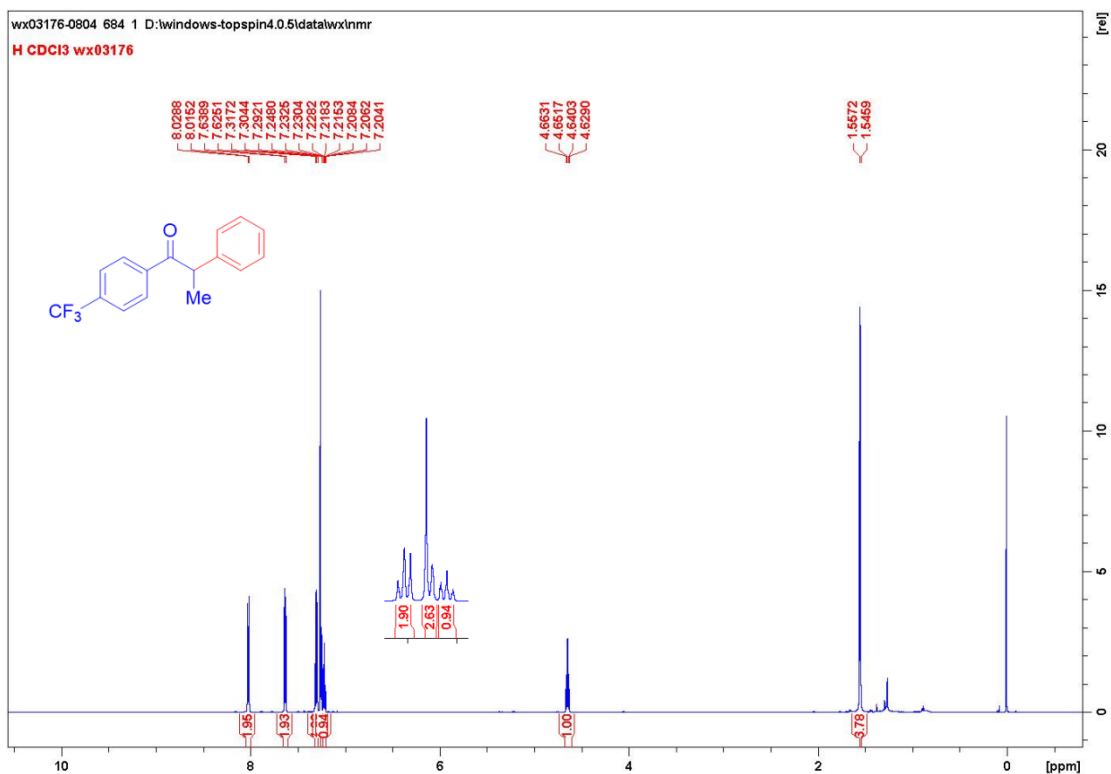

<sup>1</sup>H NMR (600 MHz, CDCl<sub>3</sub>) spectrum of **3v**.

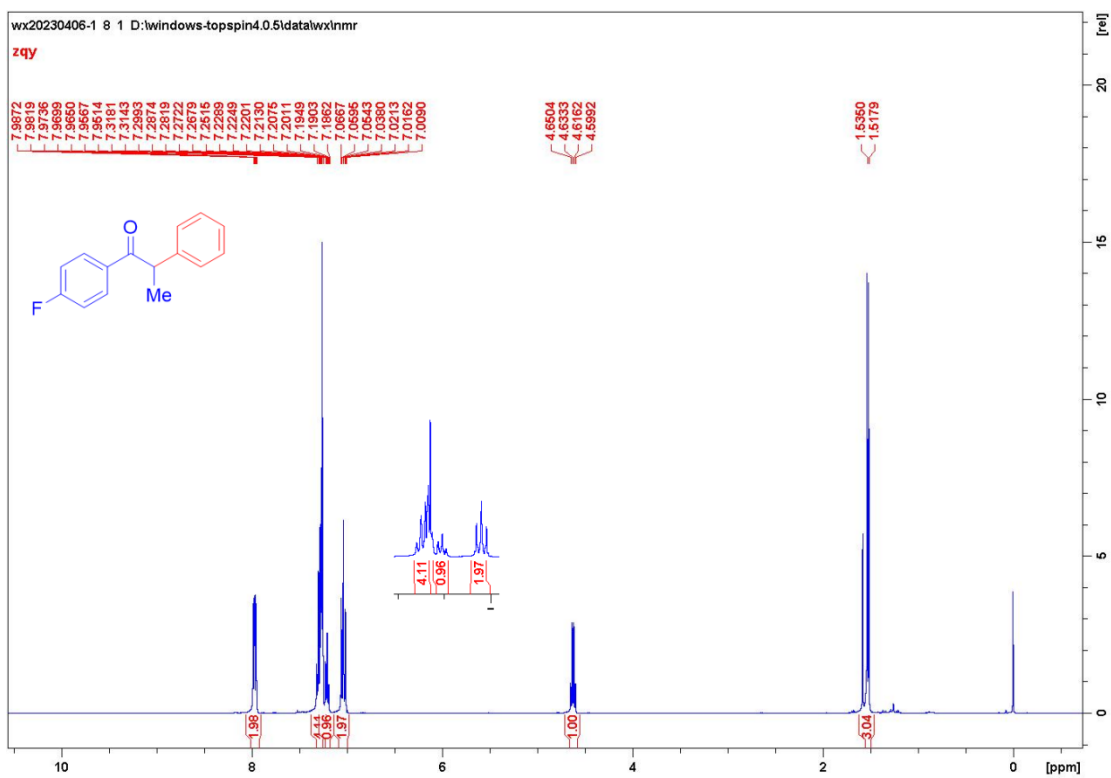

<sup>1</sup>H NMR (600 MHz, CDCl<sub>3</sub>) spectrum of **3w**.

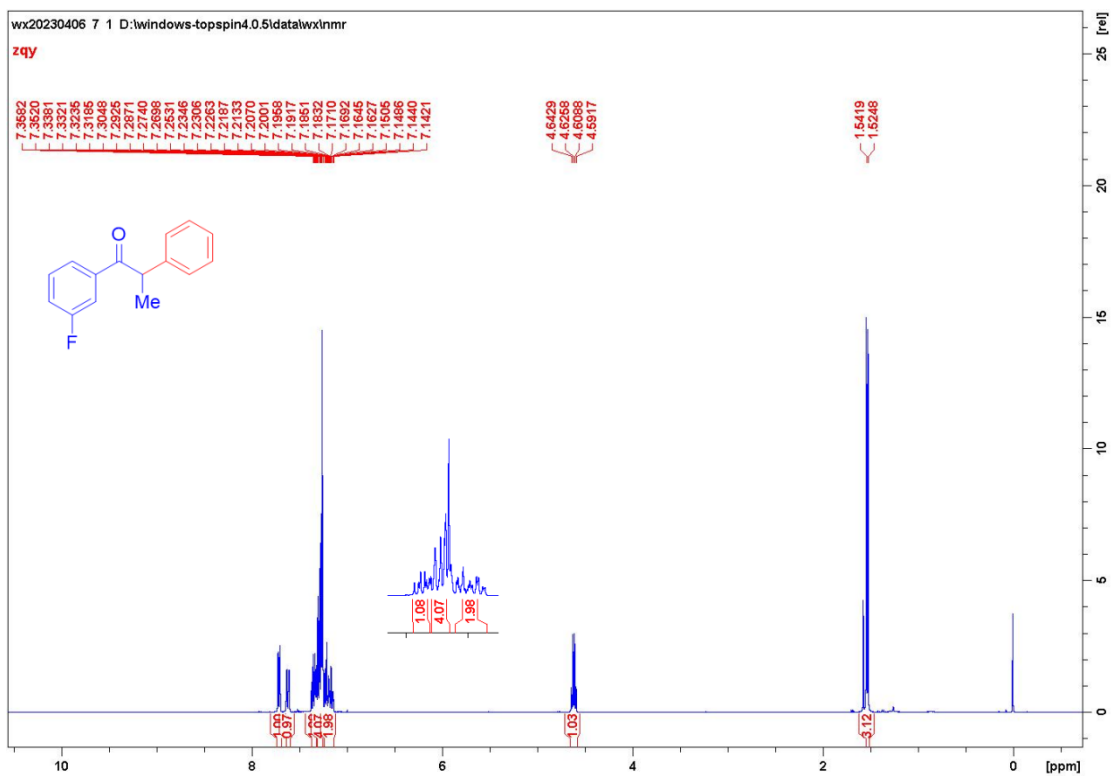

$^1\text{H}$  NMR (600 MHz,  $\text{CDCl}_3$ ) spectrum of **3x**.

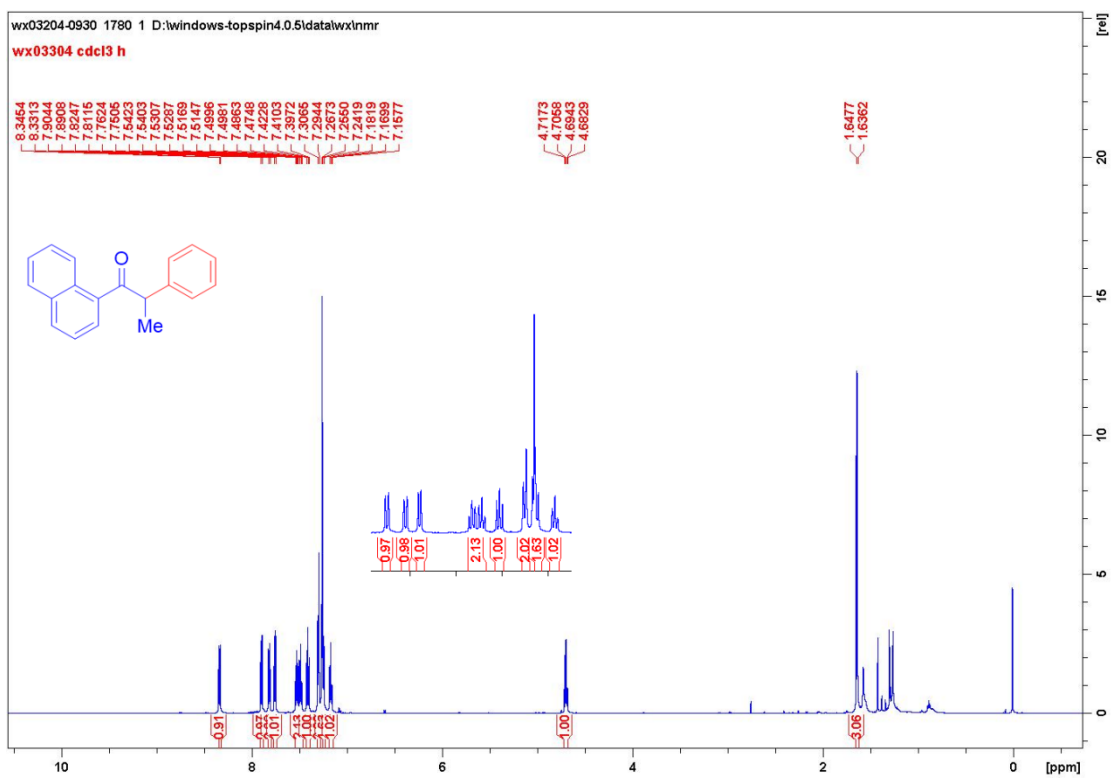

$^1\text{H}$  NMR (600 MHz,  $\text{CDCl}_3$ ) spectrum of **3y**.

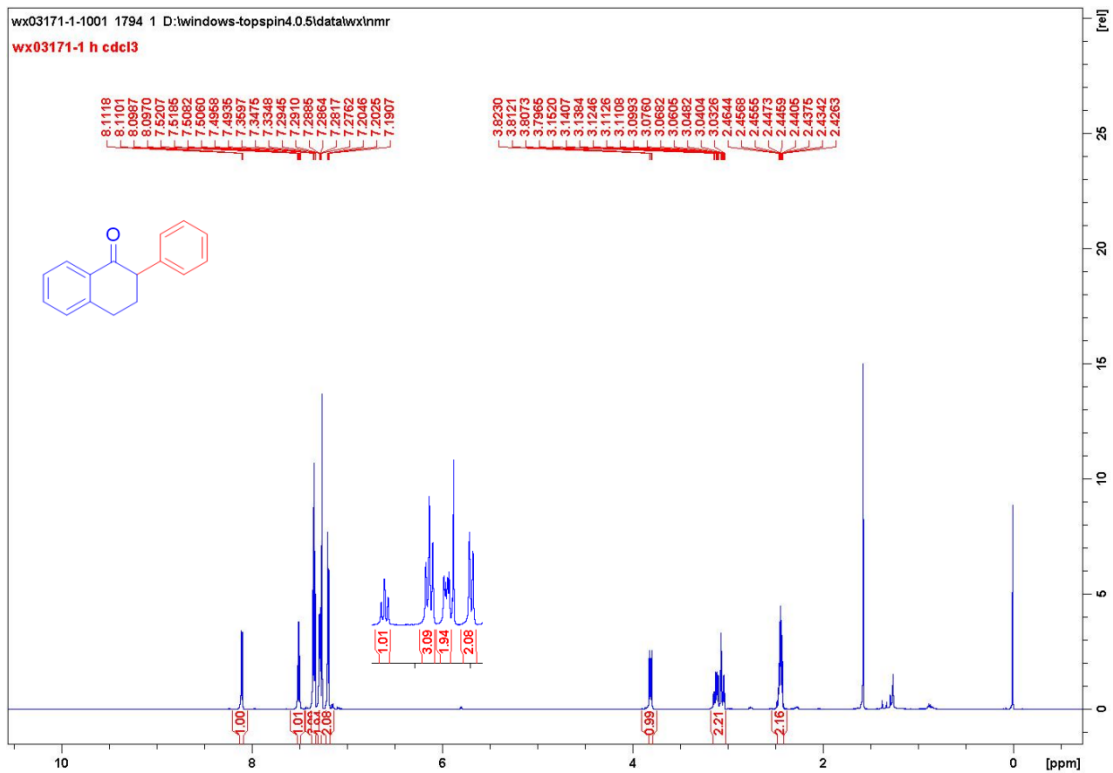

$^1\text{H}$  NMR (600 MHz,  $\text{CDCl}_3$ ) spectrum of **3z**.
